# Supplementary material for: Diversity of transformation of heteroallenes on acenaphthene-1,2-diimine aluminum oxide
Source: Royal Society of Chemistry journal article supplement (doi:10.1039/d3dt04333a), 2024-01-01
Supplement: d3dt04333a1.pdf [file d3dt04333a1.pdf]

# Diversity of Transformation of Heteroallenes on Acenaphthene-1,2-diimine Aluminum Oxide

*Tatyana S. Koptseva<sup>1</sup>, Alexandra A. Skatova<sup>1</sup>, Mikhail V. Moskalev<sup>1</sup>, Roman V. Rumyantsev<sup>1</sup>  
and Igor L. Fedushkin<sup>1\*</sup>*

<sup>1</sup> G.A. Razuvaev Institute of Organometallic Chemistry, Russian Academy of  
Sciences, Tropinina 49, Nizhny Novgorod 603137, Russian Federation

**Table 1S.** Crystal data and structure refinement details for compounds **2-7**.

|                                                       | <b>2</b>                                                                       | <b>3</b>                                                                      | <b>4</b>                                                                             | <b>5</b>                                                                        | <b>6</b>                                                                         | <b>7</b>                                                                                     |
|-------------------------------------------------------|--------------------------------------------------------------------------------|-------------------------------------------------------------------------------|--------------------------------------------------------------------------------------|---------------------------------------------------------------------------------|----------------------------------------------------------------------------------|----------------------------------------------------------------------------------------------|
| <b>Empirical Formula</b>                              | C <sub>94</sub> H <sub>100</sub> Al <sub>2</sub> N <sub>5</sub> O <sub>3</sub> | C <sub>86</sub> H <sub>99</sub> Al <sub>2</sub> N <sub>5</sub> O <sub>3</sub> | C <sub>99.38</sub> H <sub>134.50</sub> Al <sub>2</sub> N <sub>6</sub> O <sub>2</sub> | C <sub>90</sub> H <sub>117</sub> Al <sub>2</sub> BN <sub>4</sub> O <sub>7</sub> | C <sub>106</sub> H <sub>128</sub> Al <sub>2</sub> BN <sub>5</sub> O <sub>5</sub> | C <sub>84</sub> H <sub>88</sub> Al <sub>2</sub> B <sub>2</sub> N <sub>4</sub> O <sub>7</sub> |
| <b>M</b>                                              | 1401.74                                                                        | 1304.66                                                                       | 1499.08                                                                              | 1431.64                                                                         | 1616.90                                                                          | 1341.16                                                                                      |
| <b>T/K</b>                                            | 100(2)                                                                         | 100(2)                                                                        | 100(2)                                                                               | 100(2)                                                                          | 100(2)                                                                           | 100(2)                                                                                       |
| <b>Crystal System</b>                                 | Monoclinic                                                                     | Orthorhombic                                                                  | Triclinic                                                                            | Triclinic                                                                       | Monoclinic                                                                       | Monoclinic                                                                                   |
| <b>Space Group</b>                                    | <i>P2<sub>1</sub>/c</i>                                                        | <i>Pna2<sub>1</sub></i>                                                       | <i>P-1</i>                                                                           | <i>P-1</i>                                                                      | <i>Cm</i>                                                                        | <i>P2<sub>1</sub>/n</i>                                                                      |
| <b>a/Å</b>                                            | 23.6752(2)                                                                     | 28.4173(15)                                                                   | 12.4538(2)                                                                           | 12.4182(2)                                                                      | 14.8161(4)                                                                       | 12.8530(12)                                                                                  |
| <b>b/Å</b>                                            | 13.4747(1)                                                                     | 12.7221(7)                                                                    | 18.3729(3)                                                                           | 12.9986(3)                                                                      | 21.5593(4)                                                                       | 22.1044(18)                                                                                  |
| <b>c/Å</b>                                            | 13.4747(1)                                                                     | 20.6197(10)                                                                   | 21.5379(4)                                                                           | 14.7000(3)                                                                      | 14.4379(4)                                                                       | 13.1216(10)                                                                                  |
| <b>α/deg</b>                                          | 90                                                                             | 90                                                                            | 81.328(2)                                                                            | 66.956(2)                                                                       | 90                                                                               | 90                                                                                           |
| <b>β/deg</b>                                          | 97.428(1)                                                                      | 90                                                                            | 75.143(2)                                                                            | 69.651(2)                                                                       | 92.943(2)                                                                        | 92.077(7)                                                                                    |
| <b>γ/deg</b>                                          | 90                                                                             | 90                                                                            | 73.658(2)                                                                            | 88.084(2)                                                                       | 90                                                                               | 90                                                                                           |
| <b>V/Å<sup>3</sup></b>                                | 7920.62(13)                                                                    | 7454.6(7)                                                                     | 4554.49(15)                                                                          | 2032.70(8)                                                                      | 4605.7(2)                                                                        | 3725.5(5)                                                                                    |
| <b>Z</b>                                              | 4                                                                              | 4                                                                             | 2                                                                                    | 1                                                                               | 2                                                                                | 2                                                                                            |
| <b>d<sub>calc</sub>/Mg m<sup>-3</sup></b>             | 1.175                                                                          | 1.162                                                                         | 1.093                                                                                | 1.170                                                                           | 1.166                                                                            | 1.196                                                                                        |
| <b>μ(Mo Kα)/mm<sup>-1</sup></b>                       | 0.091                                                                          | 0.091                                                                         | 0.082                                                                                | 0.092                                                                           | 0.088                                                                            | 0.097                                                                                        |
| <b>F(000)</b>                                         | 2996                                                                           | 2800                                                                          | 1630                                                                                 | 772                                                                             | 1740                                                                             | 1424                                                                                         |
| <b>Crystal Size/mm</b>                                | 0.58 × 0.31 × 0.29                                                             | 0.28 × 0.23 × 0.18                                                            | 0.55 × 0.38 × 0.30                                                                   | 0.63 × 0.31 × 0.20                                                              | 0.62 × 0.47 × 0.23                                                               | 0.60 × 0.23 × 0.10                                                                           |
| <b>θ range/deg</b>                                    | 2.228–30.508                                                                   | 2.365–25.025                                                                  | 2.191–28.000                                                                         | 2.249–29.129                                                                    | 2.232–26.733                                                                     | 2.179–26.022                                                                                 |
| <b>Limiting indices</b>                               | -13 ≤ h ≤ 33<br>-19 ≤ k ≤ 19<br>-35 ≤ l ≤ 35                                   | -33 ≤ h ≤ 32<br>-15 ≤ k ≤ 15<br>-24 ≤ l ≤ 24                                  | -16 ≤ h ≤ 16<br>-24 ≤ k ≤ 24<br>-28 ≤ l ≤ 28                                         | -17 ≤ h ≤ 17<br>-17 ≤ k ≤ 17<br>-20 ≤ l ≤ 20                                    | -18 ≤ h ≤ 18<br>-27 ≤ k ≤ 27<br>-18 ≤ l ≤ 17                                     | -15 ≤ h ≤ 15<br>-27 ≤ k ≤ 27<br>-16 ≤ l ≤ 16                                                 |
| <b>Reflections Collected/<br/>Unique</b>              | 156778 / 24148                                                                 | 72003 / 13075                                                                 | 54832 / 7556                                                                         | 37428 / 10903                                                                   | 30266 / 9633                                                                     | 84321 / 7335                                                                                 |
| <b>R<sub>int</sub></b>                                | 0.0581                                                                         | 0.1449                                                                        | 0.0464                                                                               | 0.0414                                                                          | 0.0306                                                                           | 0.0972                                                                                       |
| <b>Data/Restraints/<br/>Parameters</b>                | 24148 / 109 / 984                                                              | 13075 / 3 / 882                                                               | 21964 / 496 / 1338                                                                   | 10903 / 200 / 582                                                               | 9633 / 213 / 609                                                                 | 7335 / 253 / 460                                                                             |
| <b>S</b>                                              | 1.017                                                                          | 1.044                                                                         | 1.063                                                                                | 1.051                                                                           | 1.064                                                                            | 1.015                                                                                        |
| <b>R<sub>1</sub> / wR<sub>2</sub> (I&gt;2σ(I))</b>    | 0.0548 / 0.1270                                                                | 0.0735 / 0.1384                                                               | 0.0899 / 0.2647                                                                      | 0.0859 / 0.2115                                                                 | 0.0733 / 0.2030                                                                  | 0.0605 / 0.1284                                                                              |
| <b>R<sub>1</sub> / wR<sub>2</sub> (all data)</b>      | 0.0936 / 0.1473                                                                | 0.1217 / 0.1622                                                               | 0.1448 / 0.2969                                                                      | 0.1252 / 0.2351                                                                 | 0.0843 / 0.2165                                                                  | 0.1044 / 0.1512                                                                              |
| <b>Larg. Diff. Peak and<br/>Hole/e Å<sup>-3</sup></b> | 0.629 / -0.371                                                                 | 0.291 / -0.280                                                                | 0.901 / -0.633                                                                       | 0.941 / -0.684                                                                  | 0.779 / -0.441                                                                   | 0.848 / -0.544                                                                               |

**Table 2S.** Selected bond lengths [Å] and angles [°] for complexes **2-7**.

| <b>Bond</b>      | <b>2</b>   | <b>Bond</b>      | <b>3</b>  |
|------------------|------------|------------------|-----------|
| Al(1)–N(1)       | 1.9069(13) | Al(1)–N(1)       | 1.915(5)  |
| Al(1)–N(2)       | 1.8898(13) | Al(1)–N(2)       | 1.892(5)  |
| N(1)–C(1)        | 1.3389(18) | N(1)–C(1)        | 1.346(8)  |
| N(2)–C(2)        | 1.3395(18) | N(2)–C(2)        | 1.341(8)  |
| C(1)–C(2)        | 1.4360(19) | C(1)–C(2)        | 1.430(8)  |
| Al(2)–N(3)       | 1.9099(13) | Al(2)–N(3)       | 1.893(5)  |
| Al(2)–N(4)       | 1.8916(13) | Al(2)–N(4)       | 1.915(5)  |
| N(3)–C(37)       | 1.3367(18) | N(3)–C(37)       | 1.350(7)  |
| N(4)–C(38)       | 1.3391(19) | N(4)–C(38)       | 1.349(8)  |
| C(37)–C(38)      | 1.435(2)   | C(37)–C(38)      | 1.419(8)  |
| Al(1)–O(1)       | 1.6924(11) | Al(1)–O(1)       | 1.692(4)  |
| Al(1)–O(3)       | 1.7571(12) | Al(1)–O(2)       | 1.747(4)  |
| Al(2)–O(1)       | 1.6922(12) | Al(2)–O(1)       | 1.709(4)  |
| Al(2)–O(2)       | 1.7622(12) | Al(2)–O(3)       | 1.748(4)  |
| O(2)–C(73)       | 1.3398(19) | O(2)–C(73)       | 1.343(7)  |
| O(3)–C(73)       | 1.3180(19) | O(3)–C(73)       | 1.354(7)  |
| N(5)–C(73)       | 1.282(2)   | N(5)–C(73)       | 1.271(8)  |
| <b>Angle</b>     |            | <b>Angle</b>     |           |
| O(1)–Al(1)–O(3)  | 109.26(6)  | O(1)–Al(1)–O(2)  | 109.3(2)  |
| N(2)–Al(1)–N(1)  | 88.73(5)   | N(2)–Al(1)–N(1)  | 87.9(2)   |
| O(1)–Al(2)–O(2)  | 109.37(6)  | O(1)–Al(2)–O(3)  | 109.7(2)  |
| N(4)–Al(2)–N(3)  | 88.50(5)   | N(4)–Al(2)–N(3)  | 88.8(2)   |
| Al(2)–O(1)–Al(1) | 117.93(7)  | Al(2)–O(1)–Al(1) | 118.3(2)  |
| O(3)–C(73)–O(2)  | 115.94(14) | O(3)–C(73)–O(2)  | 115.8(5)  |
| <b>Bond</b>      | <b>4</b>   | <b>Bond</b>      | <b>5</b>  |
| Al(1)–N(1)       | 1.914(2)   | Al(1)–N(1)       | 1.928(2)  |
| Al(1)–N(2)       | 1.930(2)   | Al(1)–N(2)       | 1.932(2)  |
| N(1)–C(1)        | 1.339(3)   | N(1)–C(1)        | 1.333(3)  |
| N(2)–C(2)        | 1.341(3)   | N(2)–C(2)        | 1.337(3)  |
| C(1)–C(2)        | 1.427(4)   | C(1)–C(2)        | 1.434(4)  |
| Al(2)–N(3)       | 1.919(2)   | Al(1)–O(1)       | 1.6832(8) |
| Al(2)–N(4)       | 1.930(2)   | Al(1)–H(1)       | 1.541(3)  |
| N(3)–C(37)       | 1.341(4)   | Al(1)–O(2)       | 1.670(4)  |
| N(4)–C(38)       | 1.336(3)   |                  |           |
| C(37)–C(38)      | 1.443(4)   |                  |           |

|            |            |
|------------|------------|
| Al(1)–O(1) | 1.6823(19) |
| Al(1)–O(2) | 1.579(4)   |
| Al(2)–N(5) | 2.060(5)   |
| Al(2)–O(1) | 1.691(2)   |
| O(2)–C(73) | 1.343(6)   |
| N(5)–C(73) | 1.413(6)   |
| N(6)–C(73) | 1.280(6)   |

| <b>Angle</b>     |            | <b>Angle</b>      |          |
|------------------|------------|-------------------|----------|
| O(1)–Al(1)–O(2)  | 111.76(17) | O(1)–Al(1)–O(2)   | 115.4(3) |
| N(2)–Al(1)–N(1)  | 87.45(10)  | N(2)–Al(1)–N(1)   | 86.83(9) |
| O(1)–Al(2)–N(5)  | 108.01(15) | Al(1')–O(1)–Al(1) | 180.0    |
| N(4)–Al(2)–N(3)  | 87.68(10)  | O(1)–Al(1)–H(1)   | 111(5)   |
| Al(2)–O(1)–Al(1) | 117.34(11) |                   |          |
| N(5)–C(73)–O(2)  | 116.3(4)   |                   |          |

| <b>Bond</b>  | <b>6</b>  | <b>Bond</b> | <b>7</b>   |
|--------------|-----------|-------------|------------|
| Al(1)–N(1)   | 1.921(4)  | Al(1)–N(1)  | 1.921(2)   |
| N(1)–C(1)    | 1.338(6)  | Al(1)–N(2)  | 1.916(2)   |
| C(1)–C(1)'   | 1.429(8)  | N(1)–C(1)   | 1.339(3)   |
| Al(2)–N(2)   | 1.940(4)  | N(2)–C(2)   | 1.338(3)   |
| N(2)–C(20)   | 1.338(6)  | C(1)–C(2)   | 1.426(4)   |
| C(20)–C(20)' | 1.449(8)  | Al(1)–O(1)  | 1.6783(7)  |
| Al(1)–O(1)   | 1.748(6)  | Al(1)–O(2)  | 1.7324(18) |
| Al(1)–O(3)   | 1.683(6)  | O(2)–B(1)   | 1.309(4)   |
| Al(2)–O(2)   | 1.701(6)  |             |            |
| Al(2)–O(3)   | 1.683(6)  |             |            |
| O(1)–C(39)   | 1.282(10) |             |            |
| N(3)–C(39)   | 1.246(11) |             |            |
| O(2)–B(1)    | 1.396(10) |             |            |

  

| <b>Angle</b>     |          | <b>Angle</b>      |           |
|------------------|----------|-------------------|-----------|
| O(1)–Al(1)–O(3)  | 113.3(3) | O(1)–Al(1)–O(2)   | 114.45(7) |
| N(1)–Al(1)–N(1)' | 87.0(2)  | N(1)–Al(1)–N(2)   | 87.11(9)  |
| O(2)–Al(2)–O(3)  | 114.6(3) | Al(1)–O(1)–Al(1') | 180.00(3) |
| N(2)–Al(2)–N(2)' | 86.7(2)  |                   |           |
| Al(2)–O(3)–Al(1) | 179.9(4) |                   |           |

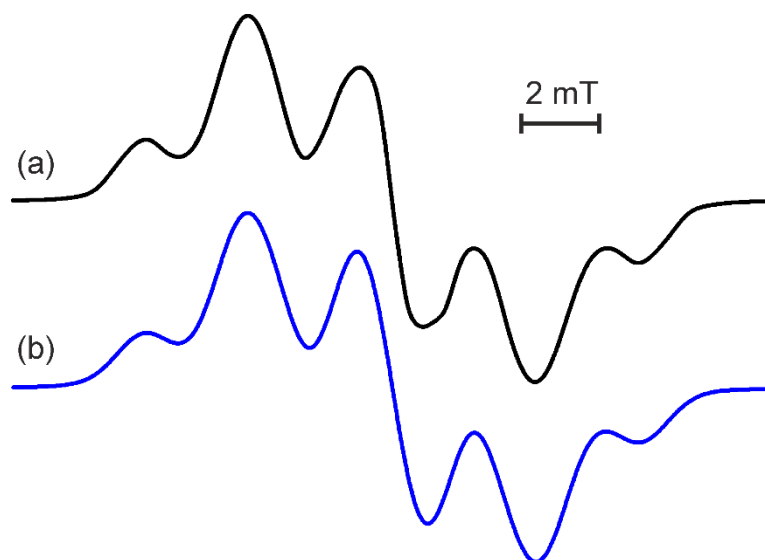

**Figure S1.** ESR spectrum of compound **2** (2-MeTHF, 130 K): (a) experimental; (b) simulated ( $g = 2.0068$ ,  $D = 6.36$  mT,  $E = 0.48$  mT).

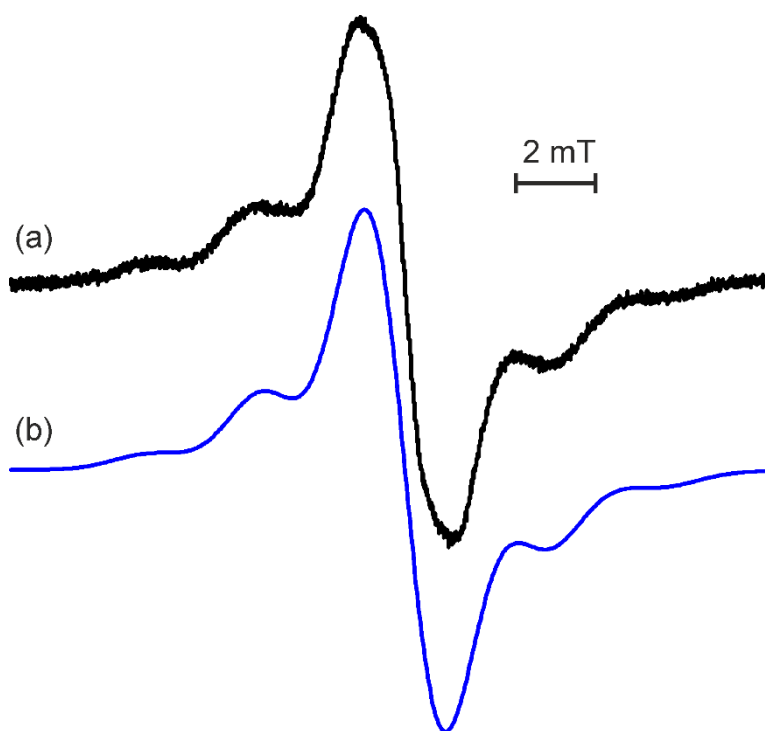

**Figure S2.** ESR spectrum of compound **3** (toluene, 150 K): (a) experimental; (b) simulated ( $g = 2.0054$ ,  $D = 6.53$  mT,  $E = 0$  mT).

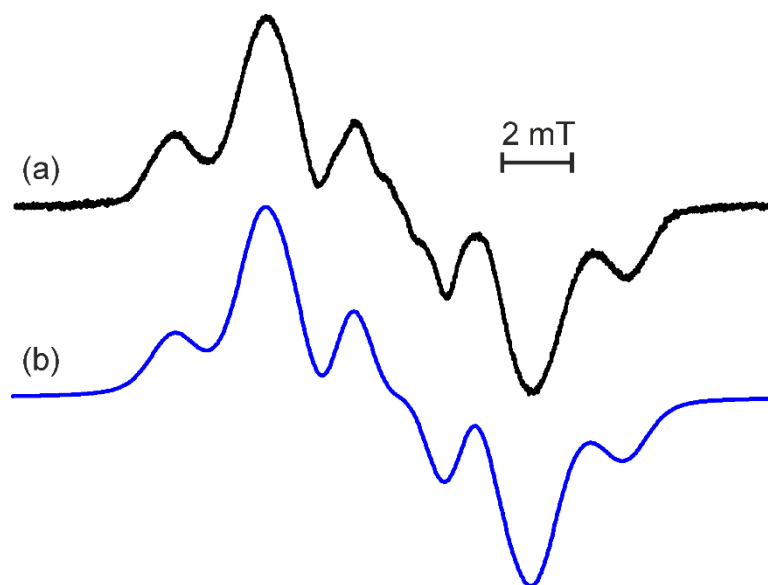

**Figure S3.** ESR spectrum of compound **4** (2-MeTHF, 130 K): (a) experimental; (b) simulated ( $g = 2.0047$ ,  $D = 6.56$  mT,  $E = 0.49$  mT).

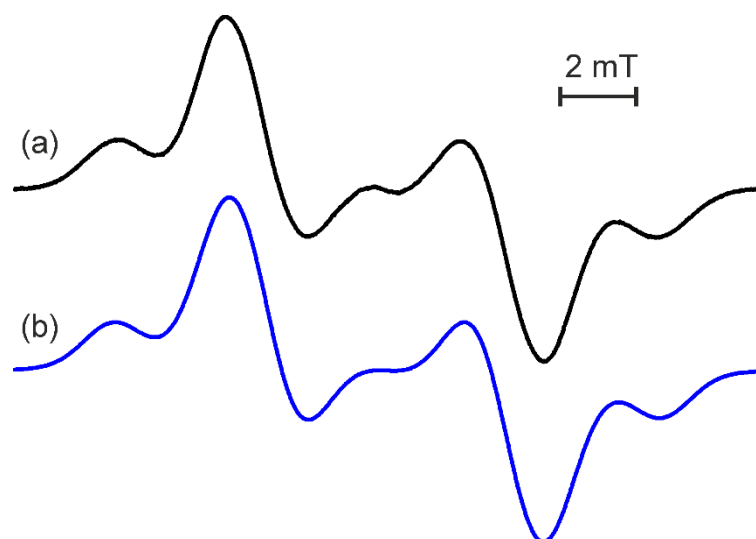

**Figure S4.** ESR spectrum of compound **5** (2-MeTHF, 130 K): (a) experimental; (b) simulated ( $g = 2.0055$ ,  $D = 7.29$  mT,  $E = 0.46$  mT).

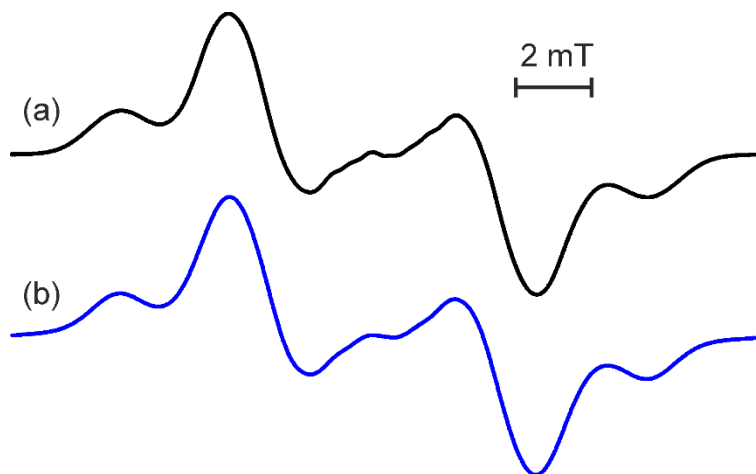

**Figure S5.** ESR spectrum of compound **6** (2-MeTHF, 130 K): (a) experimental; (b) simulated ( $g = 2.0055$ ,  $D = 7.04$  mT,  $E = 0.47$  mT).

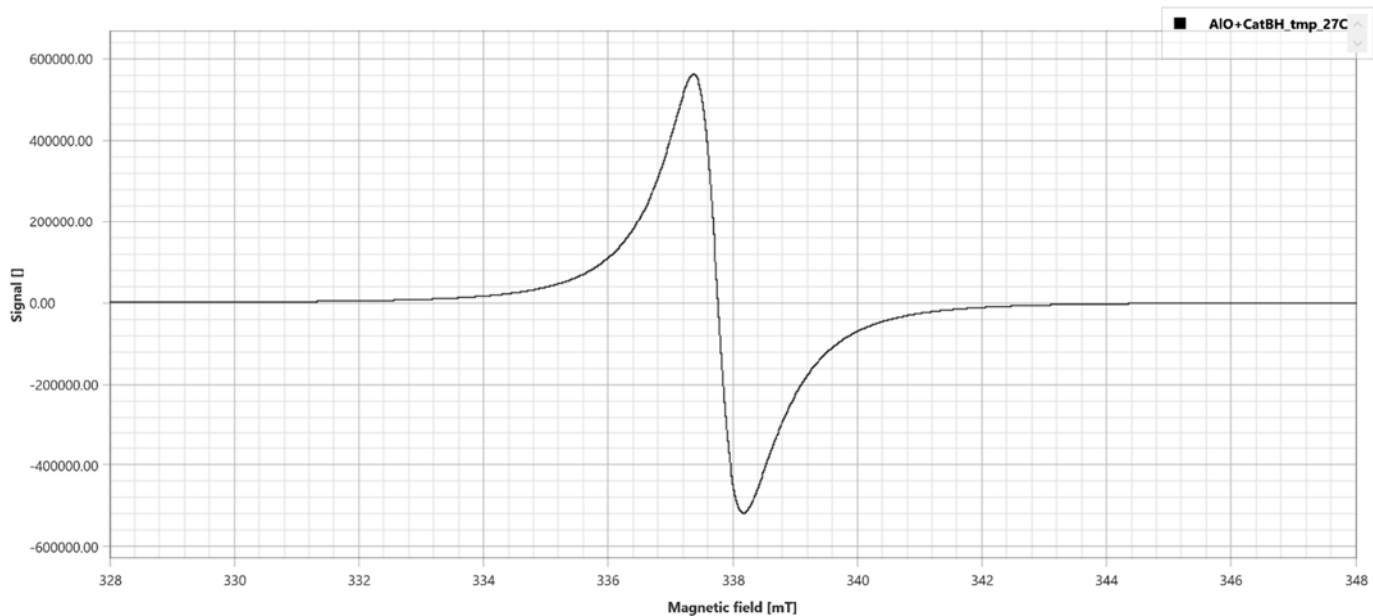

**Figure S6.** ESR spectrum of compound **7** in the solid state.

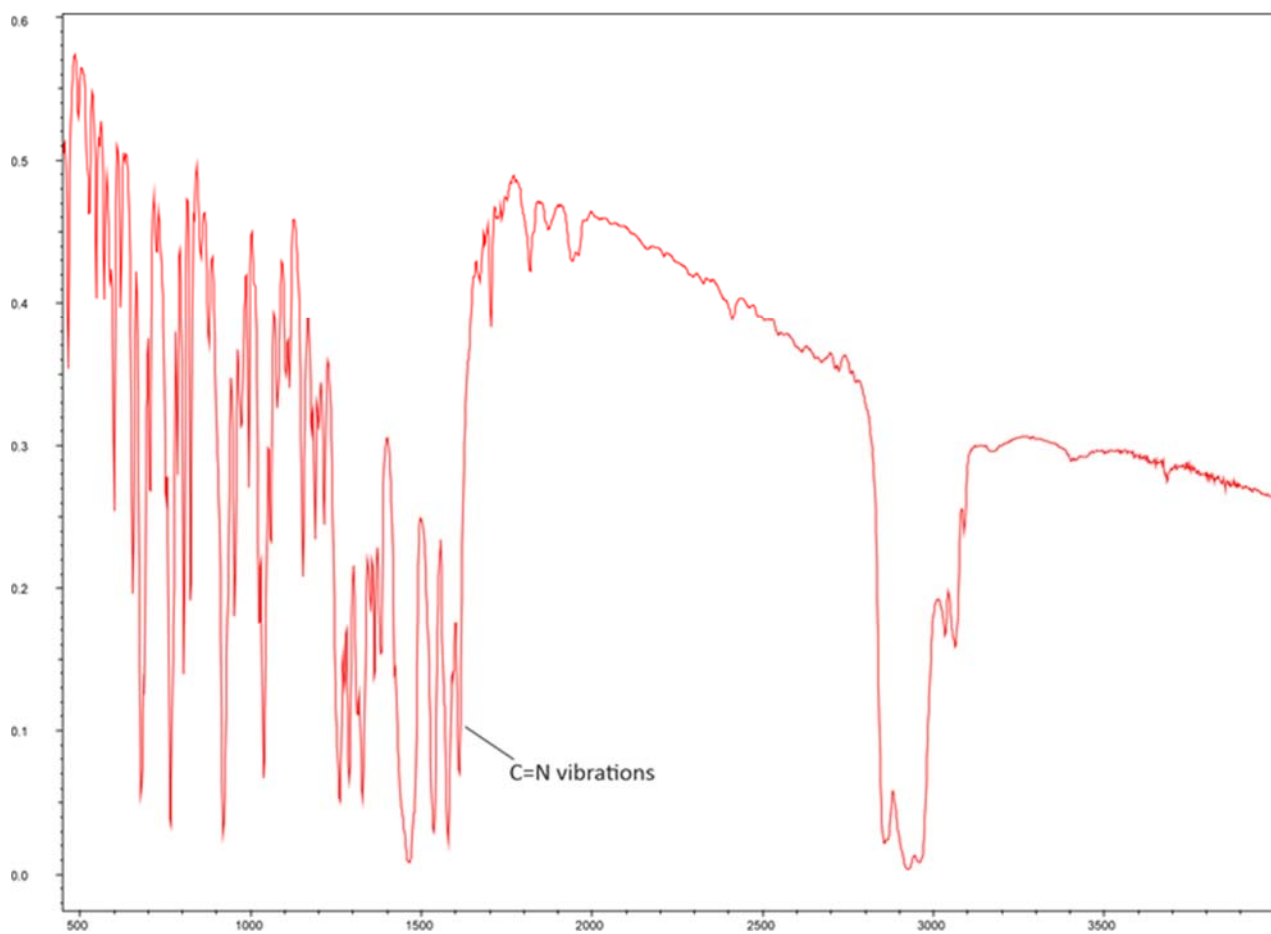

**Figure S7.** IR spectrum of compound **2**.

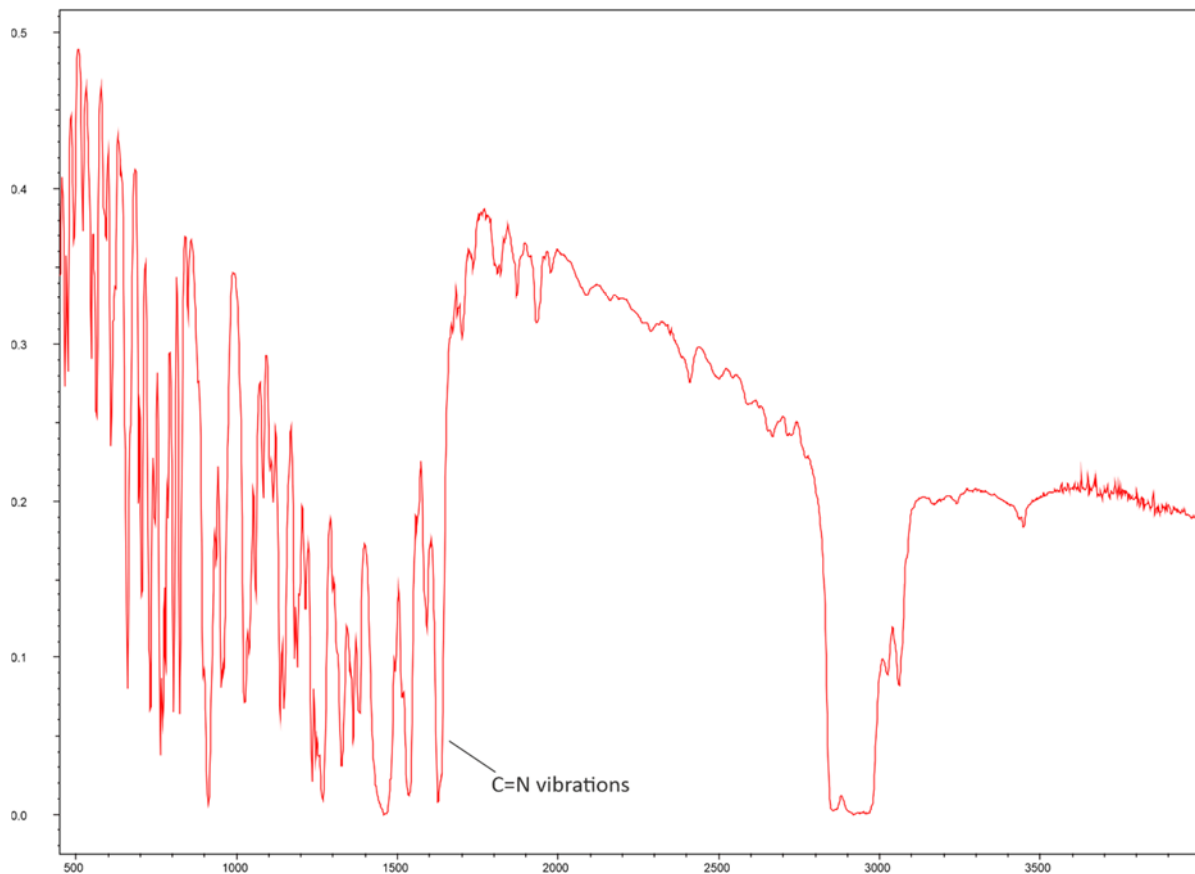

**Figure S8.** IR spectrum of compound **3**.

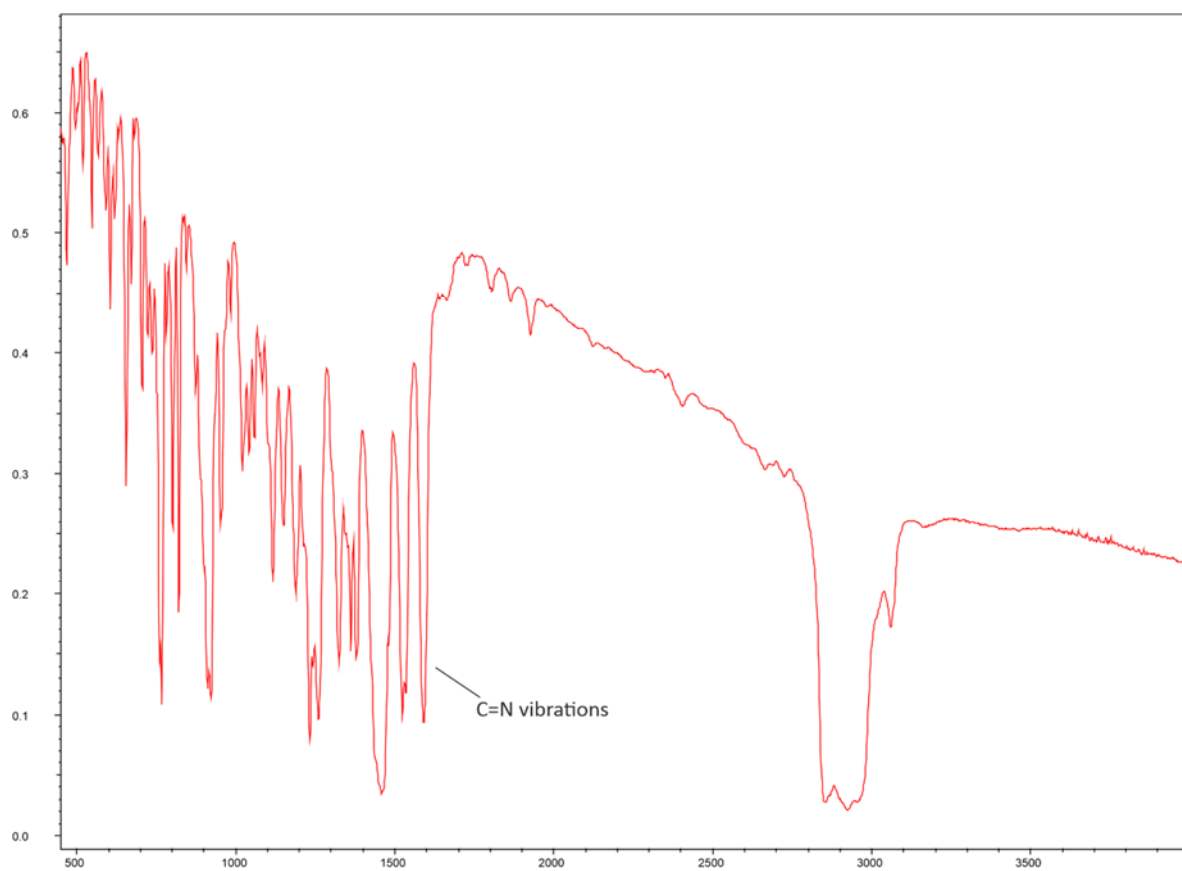

**Figure S9.** IR spectrum of compound **4**.



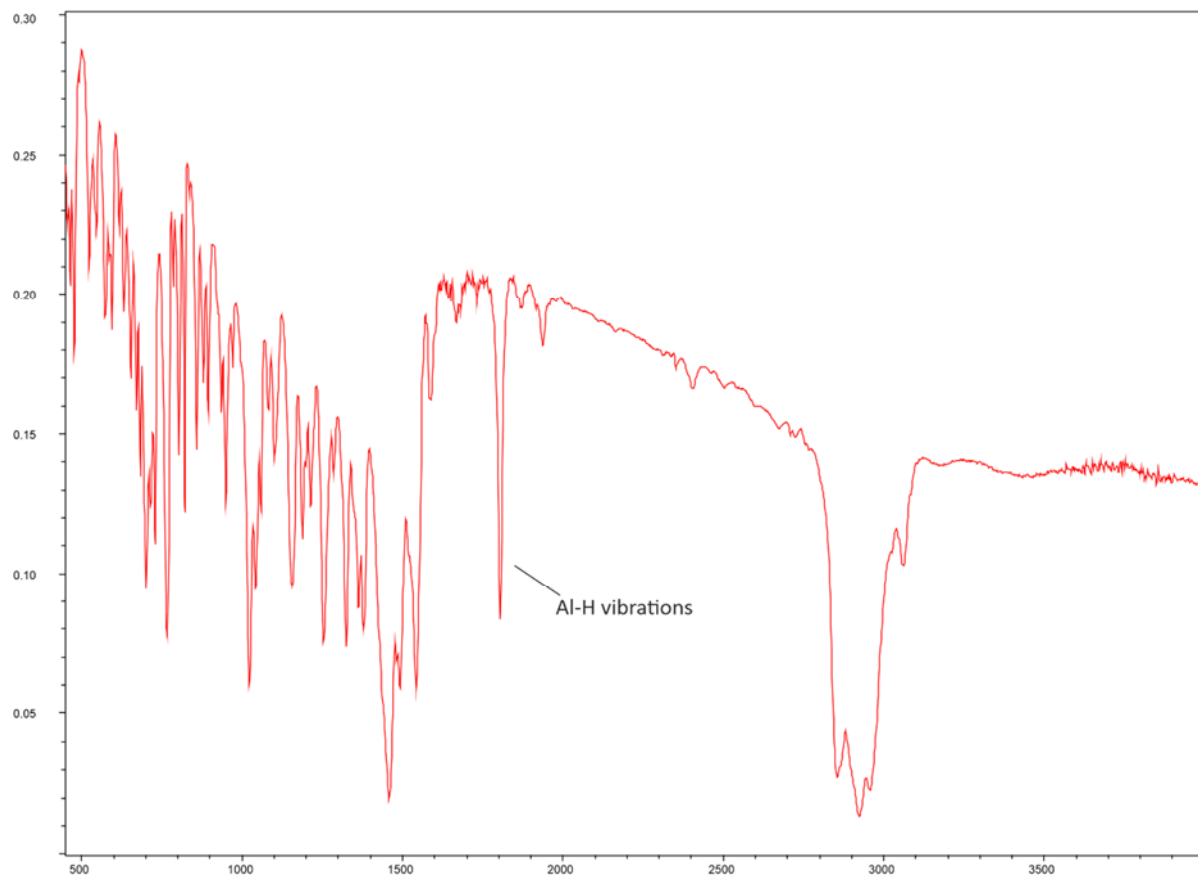

**Figure S10.** IR spectrum of compound **5**.

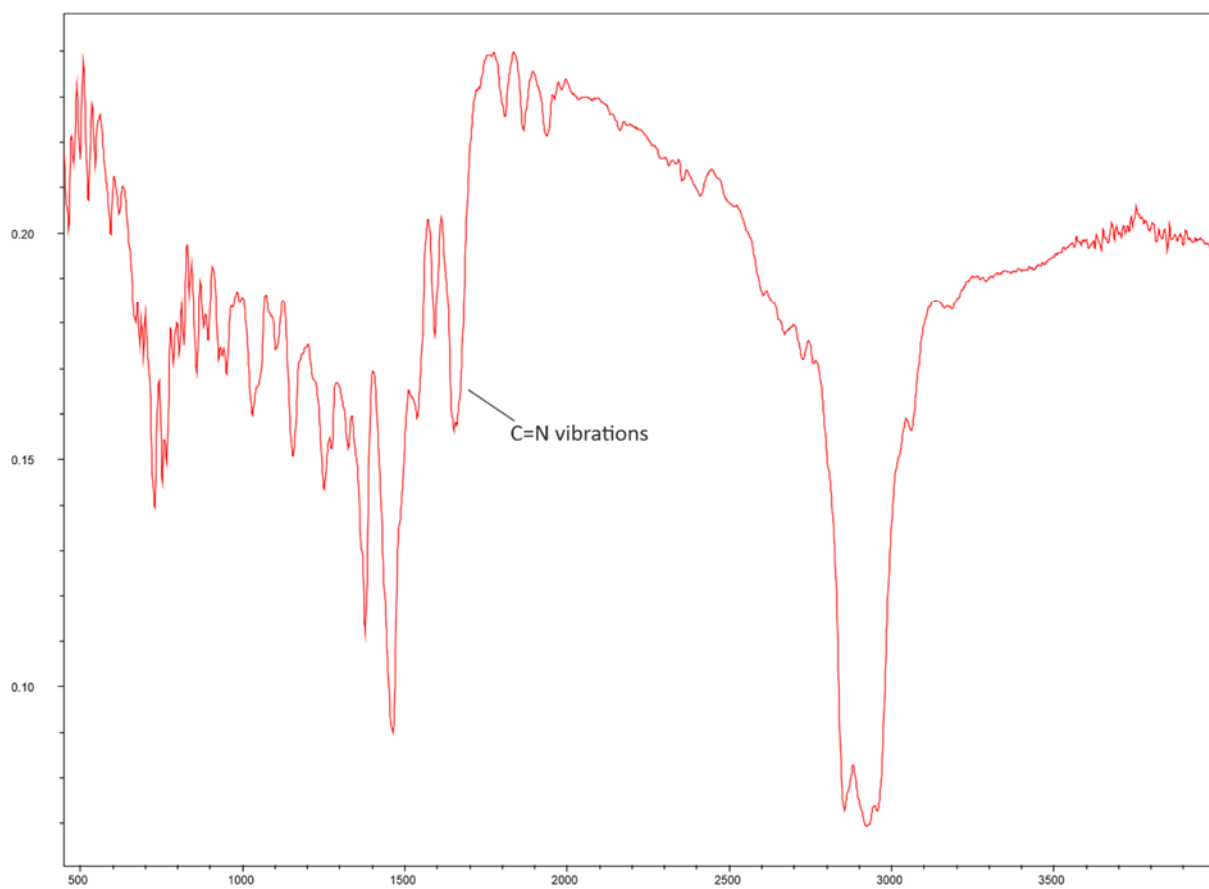

**Figure S11.** IR spectrum of compound **6**.

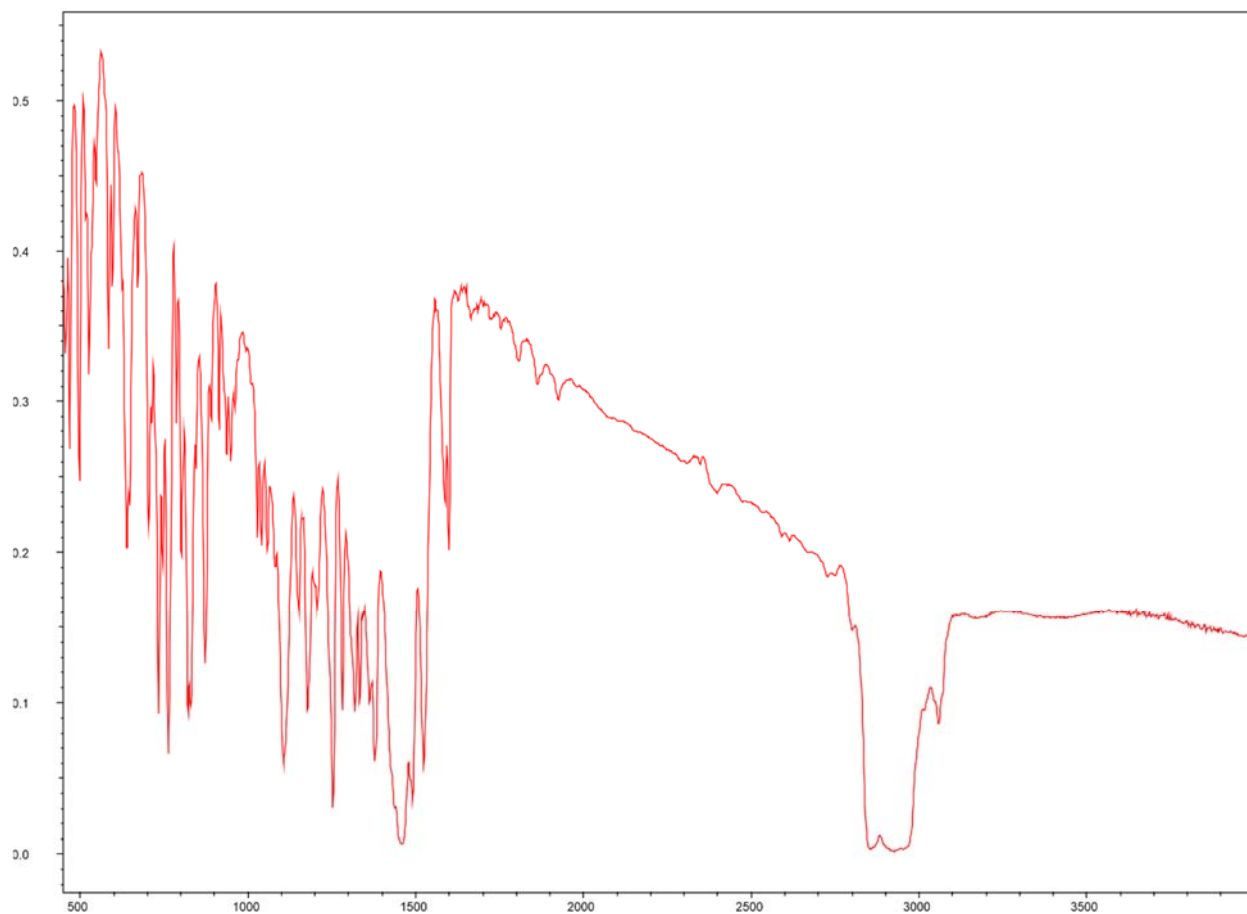

**Figure S12.** IR spectrum of compound 7.

## General Procedure for Catalytic Hydroboration of Heteroallenes

### General Procedures

All manipulations were performed under a dinitrogen atmosphere using standard glovebox and Schlenk techniques. NMR spectra were recorded on Bruker NMR spectrometers at 400 MHz ( $^1\text{H}$ ) and 300 MHz ( $^1\text{H}$ ) and 128.36 MHz ( $^{11}\text{B}$ ). Multiplicities are reported as singlet (s), doublet (d), triplet (t), and multiplet (m). Chemical shifts are reported in ppm. Benzene- $d_6$  ( $\text{C}_6\text{D}_6$ ) was dried over Na/benzophenone and distilled.

### General Procedure for Trihydroboration of Isocyanates.

In a NMR tube, 13.0 mg (5 mol%) of catalyst **1**, 96 mg (3.0 equiv., 0.75 mmol) of HBpin was added, followed by 0.25 mmol (1.0 equiv.) of Isocyanates and  $\text{C}_6\text{D}_6$  (0,5 ml). The NMR tube was sealed. This mixture was then transferred to an oil bath at 100 °C for 24-48 h. The  $^1\text{H}$  NMR spectrum confirms the appearance of a new  $\text{NCH}_3$  peak of N-boryl methylamines.  $(\text{Bpin})_2\text{O}$  is found as a side-product in all substrates:  $^1\text{H}$  NMR  $\delta$  0.98 ppm;  $^{11}\text{B}$  NMR  $\delta$  21.68 ppm.

### Analytical data of Trihydroboration Products of Isocyanates.

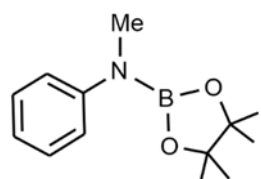

NMR yield 75%.

$^1\text{H}$  NMR (400 MHz,  $\text{C}_6\text{D}_6$ ):  $\delta$  7.42 (d, 2H, Ph), 7.17 (t, 2H, Ph), 6.83 (t, 1H, Ph), 2.97 (s, 3H,  $\text{CH}_3$ ), 1.05 (s, 12H, Bpin).  $^{11}\text{B}$  NMR (128 MHz,  $\text{C}_6\text{D}_6$ ): 24.59.

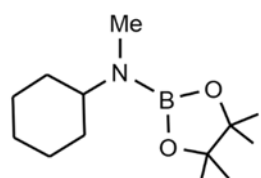

NMR yield 71%.

$^1\text{H}$  NMR (400 MHz,  $\text{C}_6\text{D}_6$ ):  $\delta$  3.25 (t, 1H, Cy), 2.59 (s, 3H,  $\text{CH}_3$ ), 1.66-1.54 (m, 4H, Cy), 1.48-1.37 (m, 3H, Cy), 1.20-1.11 (m, 3H, Cy), 1.09 (s, 12H, Bpin).  $^{11}\text{B}$  NMR (128 MHz,  $\text{C}_6\text{D}_6$ ): 24.33.

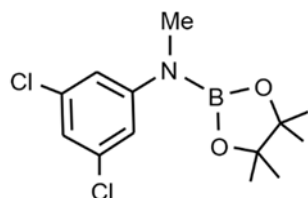

NMR yield 49%.

$^1\text{H}$  NMR (400 MHz,  $\text{C}_6\text{D}_6$ ):  $\delta$  7.31 (s, 2H, 3,6-ClPh), 6.84 (s, 2H, 3,6-ClPh), 2.62 (s, 3H,  $\text{CH}_3$ ), 0.96 (s, 12H, Bpin).  $^{11}\text{B}$  NMR (128 MHz,  $\text{C}_6\text{D}_6$ ): 24.45.

### General Procedure for Catalytic Monohydroboration of Carbodiimide.

In a NMR tube, 13.0 mg (5 mol%) of catalyst **1**, 32 mg (1.0 equiv., 0.25 mmol) of HBpin was added, followed by 0.25 mmol (1.0 equiv.) of Carbodiimides and  $\text{C}_6\text{D}_6$  (0,5 ml). The NMR tube was sealed. This mixture was then transferred to an oil bath at 100 °C for 24-48 h. The  $^1\text{H}$  NMR spectrum confirms the appearance of a new  $\text{NCHN}$  peak of N-boryl formamidines.

## Analytical data of Monohydroboration Products of Carbodiimides.

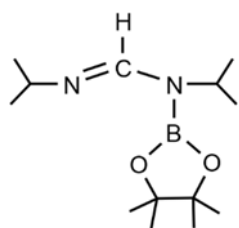

NMR yield 73%.

$^1\text{H}$  NMR (400 MHz,  $\text{C}_6\text{D}_6$ ):  $\delta$  8.20 (s, 1H, CH), 4.92 (sept, 1H,  $\text{CH}(\text{CH}_3)_2$ ), 3.27 (sept, 1H,  $\text{CH}(\text{CH}_3)_2$ ), 1.40 (d, 6H,  $\text{CH}(\text{CH}_3)_2$ ), 1.15 (d, 6H,  $\text{CH}(\text{CH}_3)_2$ ), 1.00 (s, 12H, Bpin).

$^{11}\text{B}$  NMR (128 MHz,  $\text{C}_6\text{D}_6$ ): 25.25.

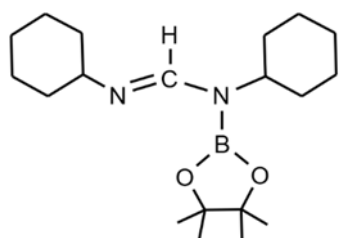

NMR yield 70%.

$^1\text{H}$  NMR (400 MHz,  $\text{C}_6\text{D}_6$ ):  $\delta$  8.27 (s, 1H, CH), 4.60-4.49 (m, 1H, Cy), 3.00-2.89 (m, 1H, Cy), 2.18-2.03 (m, 2H, Cy), 1.91-1.84 (m, 2H, Cy), 1.73-1.62 (m, 6H, Cy), 1.51-1.42 (m, 2H, Cy), 1.33-1.05 (m, 8H, Cy), 1.02 (s, 12H, Bpin).

$^{11}\text{B}$  NMR (128 MHz,  $\text{C}_6\text{D}_6$ ): 25.33.

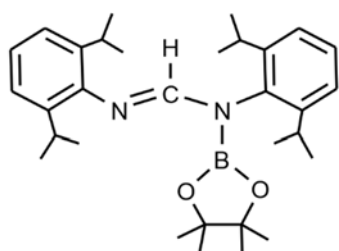

NMR yield 45%.

$^1\text{H}$  NMR (400 MHz,  $\text{C}_6\text{D}_6$ ):  $\delta$  8.28 (s, 1H, CH), 7.17 (s, 3H, Ph), 7.09 (s, 3H, Ph), 3.32 (sept, 2H,  $\text{CH}(\text{CH}_3)_2$ ), 3.24 (sept, 2H,  $\text{CH}(\text{CH}_3)_2$ ), 1.40-1.32 (m, 12H,  $\text{CH}(\text{CH}_3)_2$ ), 1.16 (d, 12H,  $\text{CH}(\text{CH}_3)_2$ ), 0.95 (s, 12H, Bpin).

$^{11}\text{B}$  NMR (128 MHz,  $\text{C}_6\text{D}_6$ ): 25.28.

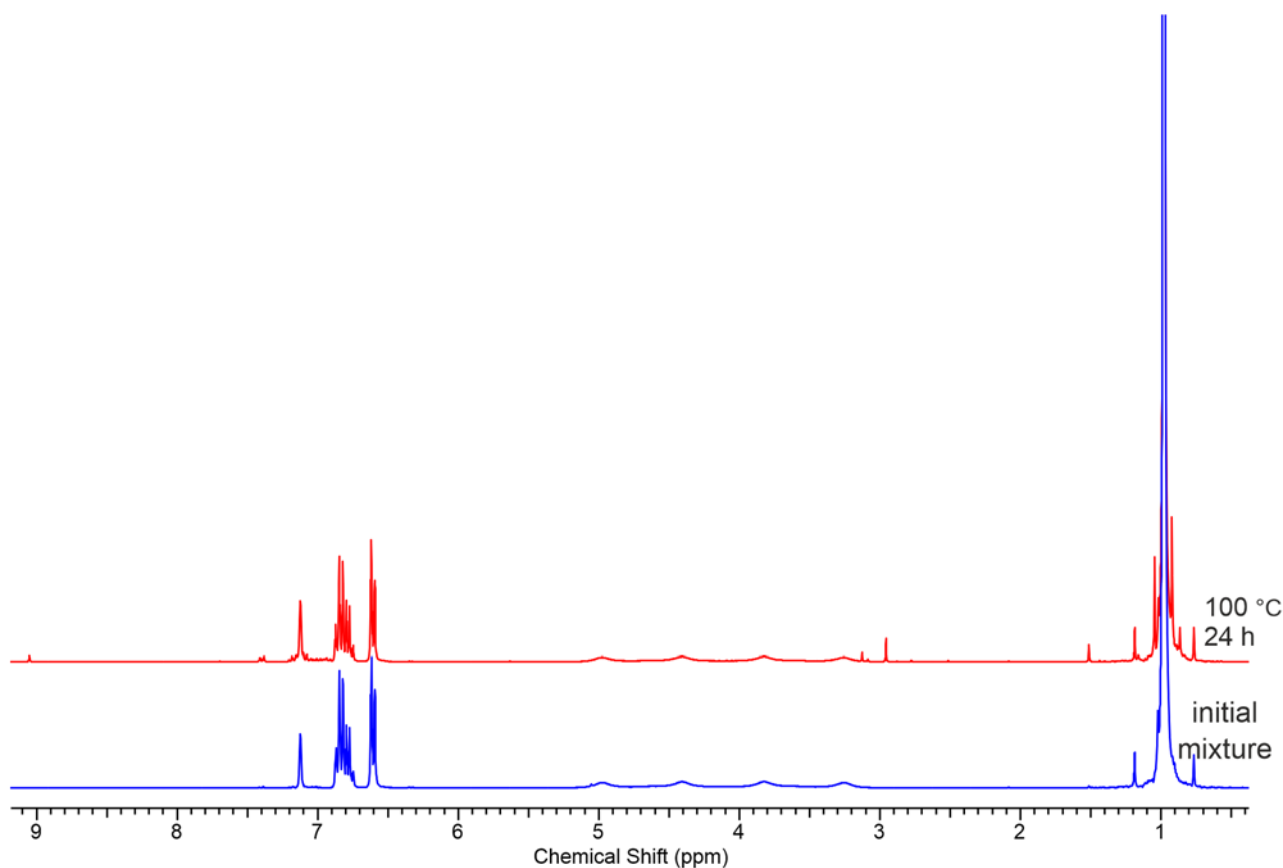

**Figure S13.**  $^1\text{H}$  NMR spectrum of phenylisocyanate with 3 equiv. of HBpin in the absence of catalyst ( $\text{C}_6\text{D}_6$ , 300 MHz).

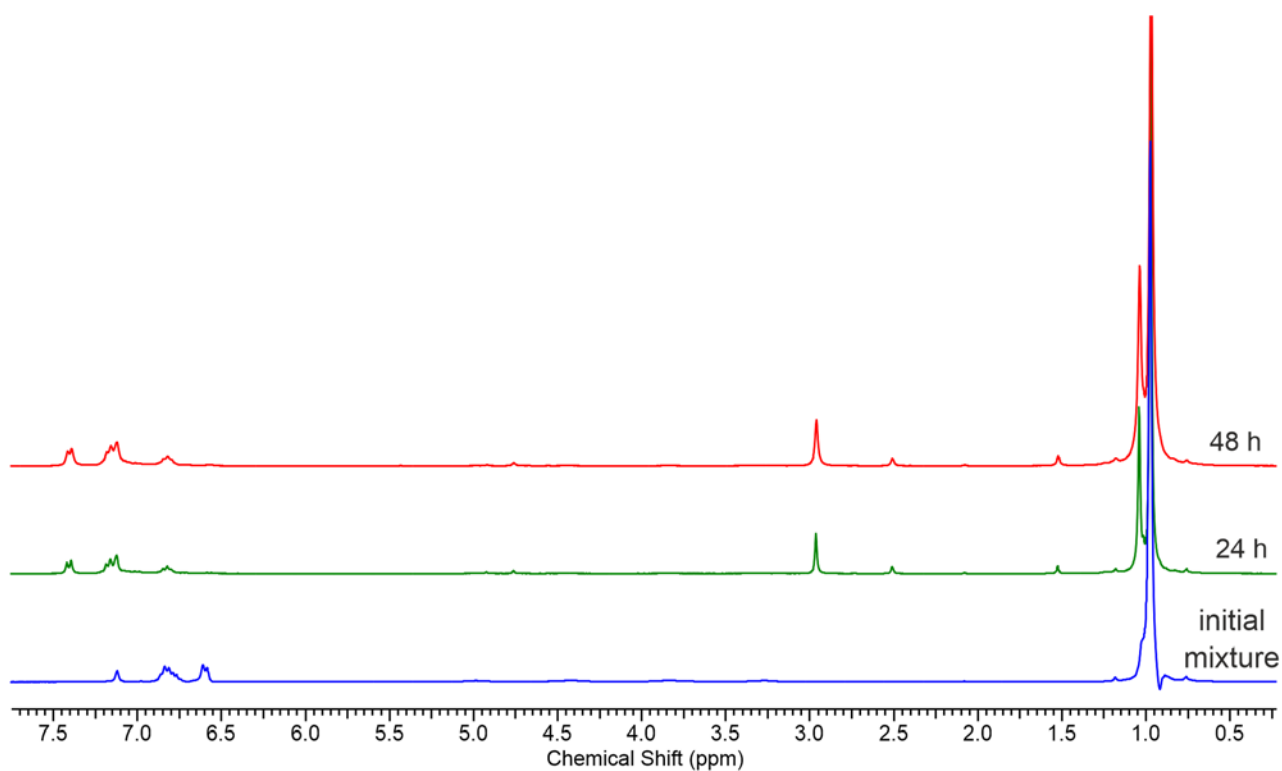

**Figure S14.** Spectrum of evolution of the reaction mixture (PhNCO + 3HBpin) over time (Cat 1, C<sub>6</sub>D<sub>6</sub>, 300 MHz).

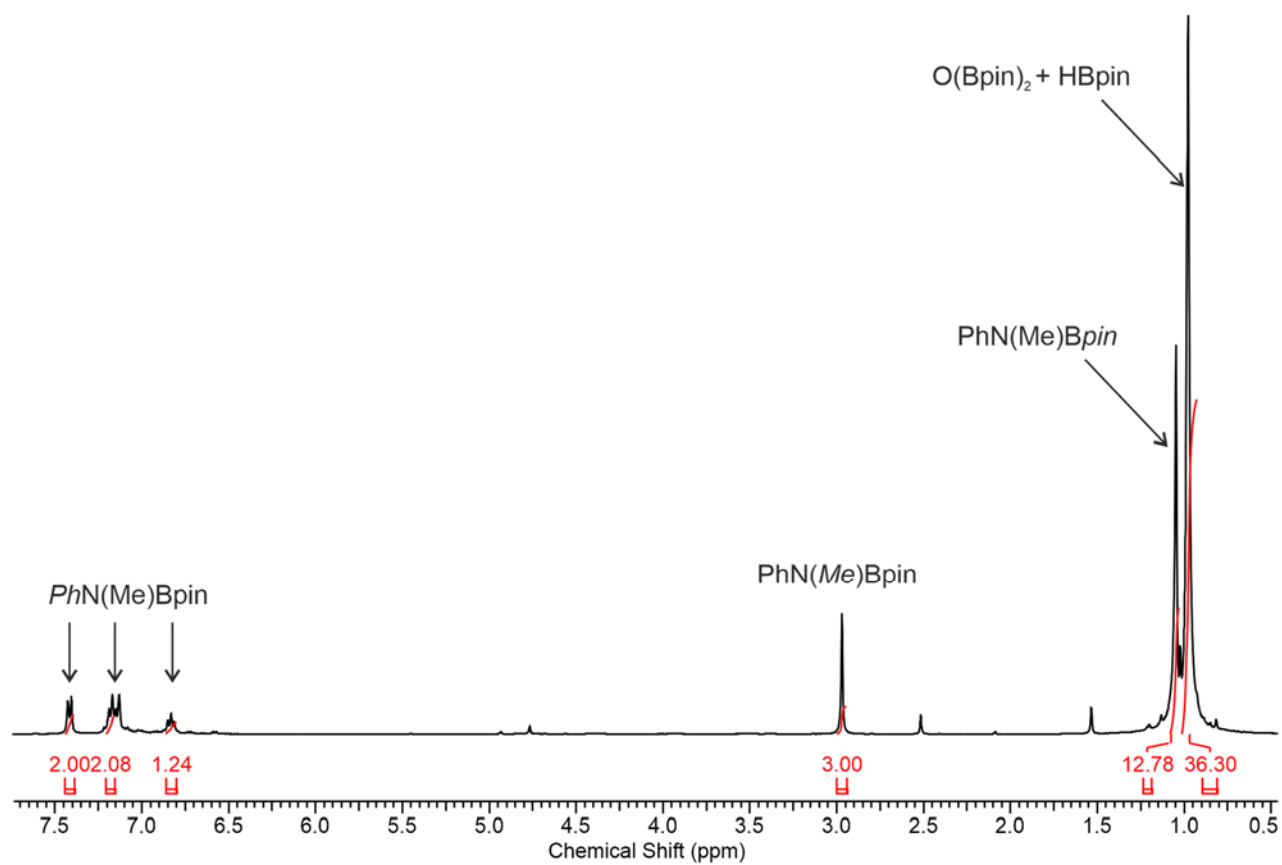

**Figure S15.** <sup>1</sup>H NMR spectrum of compound PhN(Me)Bpin (Cat 1, C<sub>6</sub>D<sub>6</sub>, 400 MHz, 21 °C).

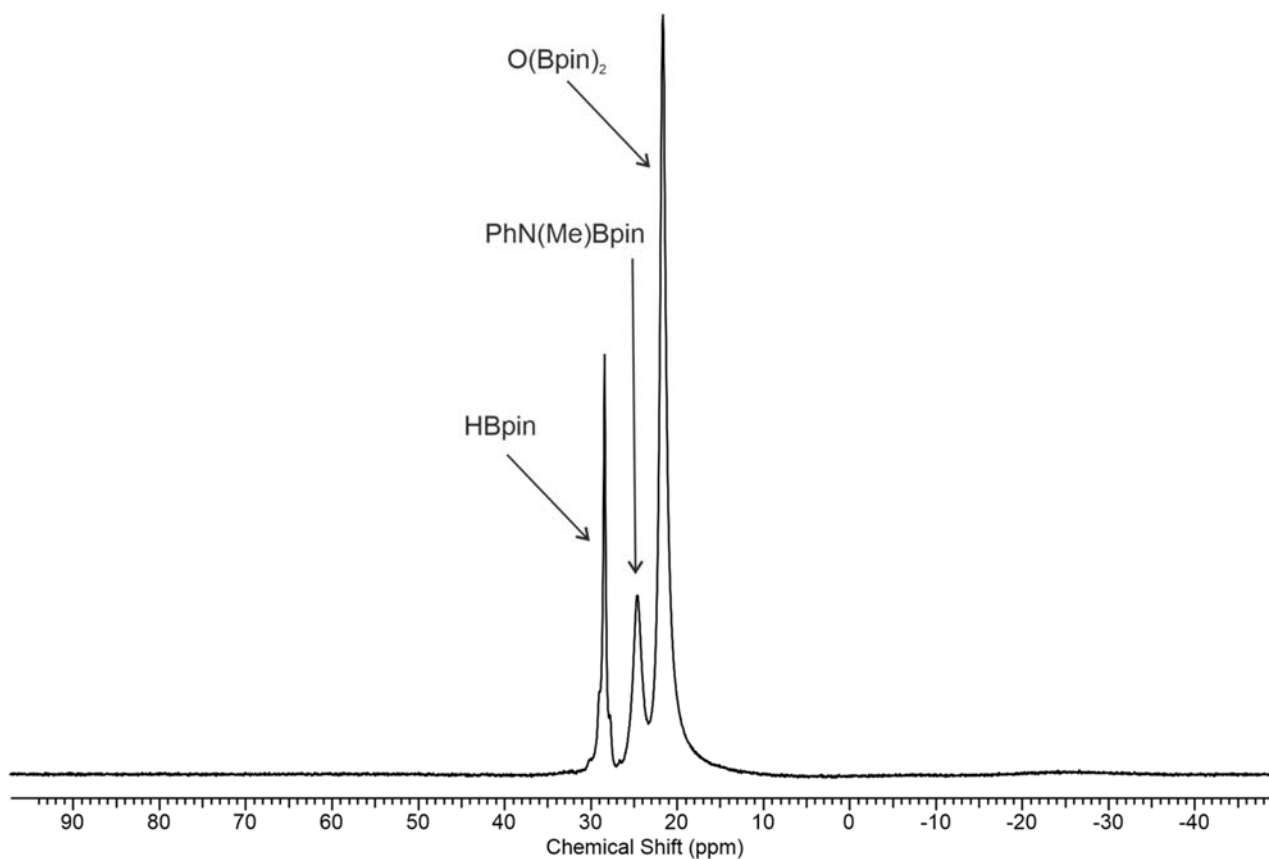

**Figure S16.**  $^{11}\text{B}$  NMR spectrum of compound PhN(Me)Bpin (Cat 1, 128 MHz,  $\text{C}_6\text{D}_6$ , 21 °C)

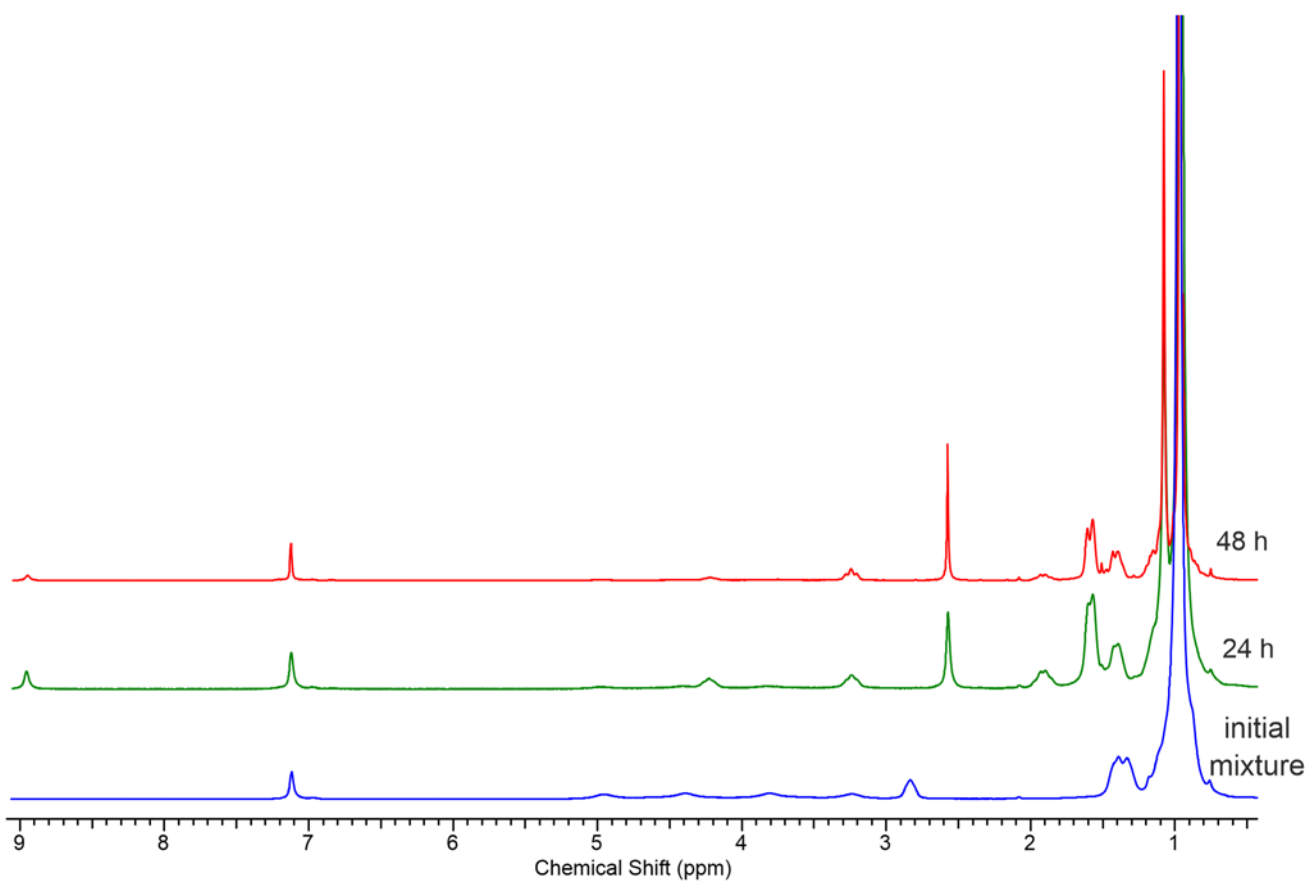

**Figure S17.** Spectrum of evolution of the reaction mixture ( $\text{CyNCO} + 3\text{HBpin}$ ) over time (Cat 1,  $\text{C}_6\text{D}_6$ , 300 MHz).

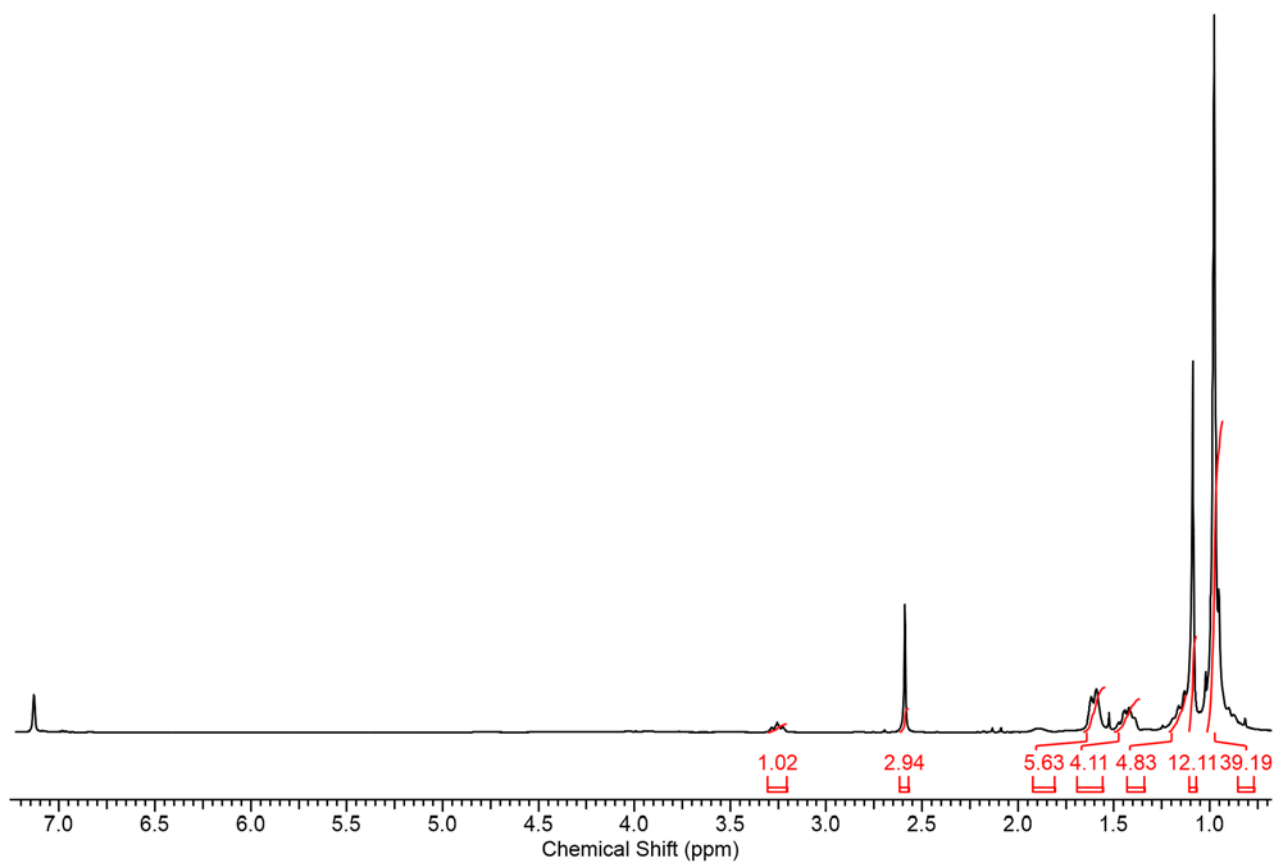

**Figure S18.**  $^1\text{H}$  NMR spectrum of compound CyN(Me)Bpin (Cat **1**,  $\text{C}_6\text{D}_6$ , 400 MHz, 21  $^\circ\text{C}$ ).

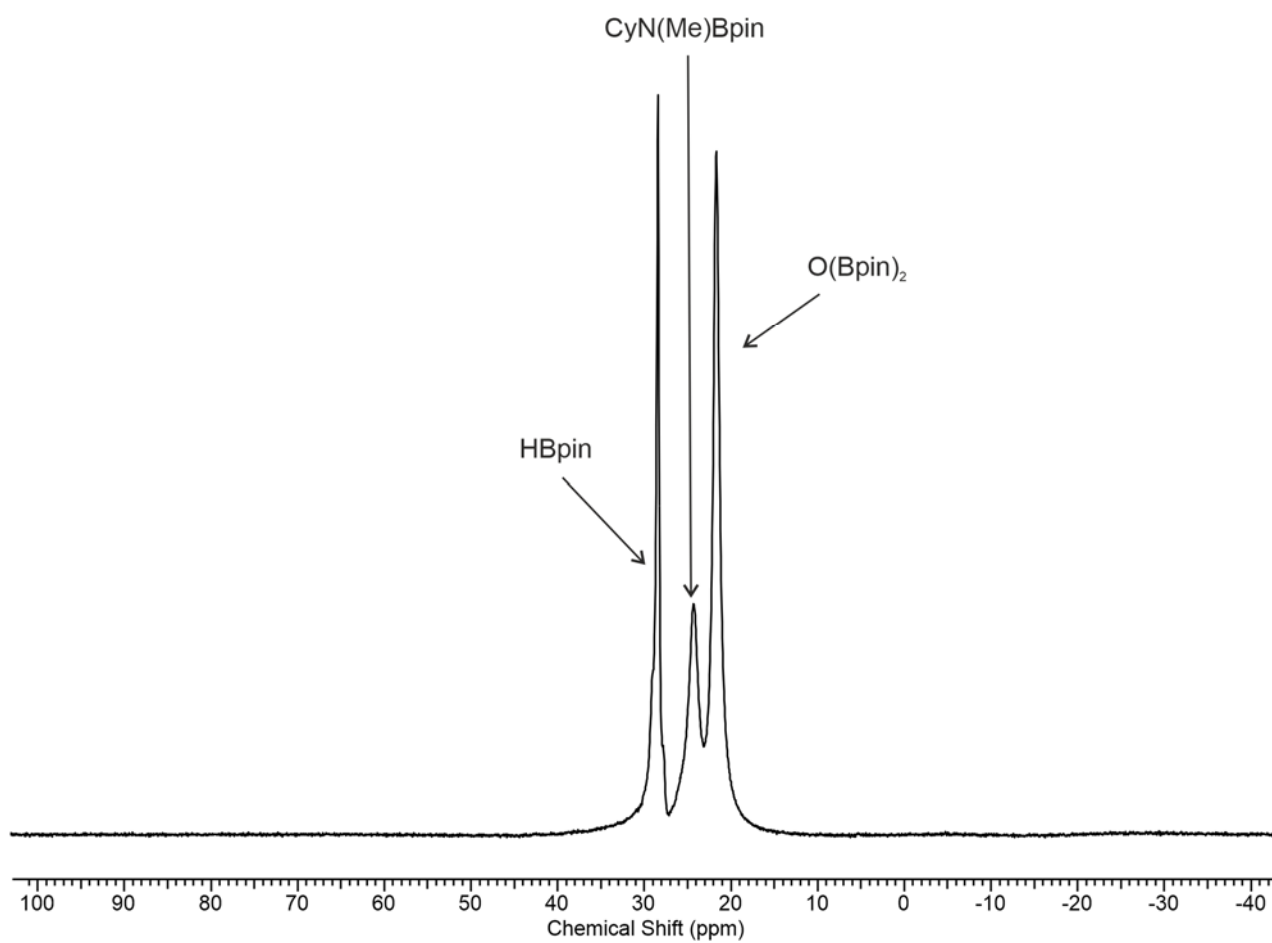

**Figure S19.**  $^{11}\text{B}$  NMR spectrum of compound CyN(Me)Bpin (Cat **1**, 128 MHz,  $\text{C}_6\text{D}_6$ , 21  $^\circ\text{C}$ )

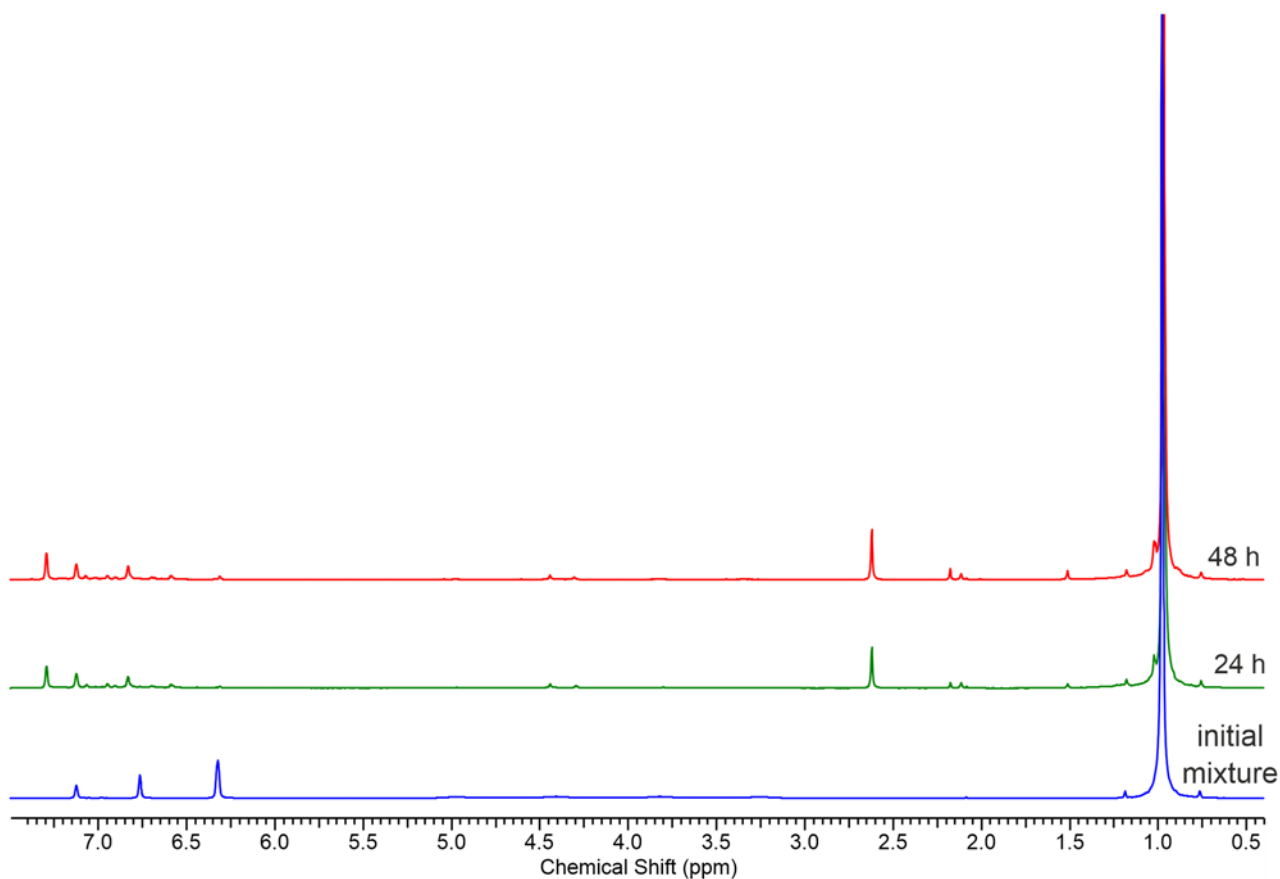

**Figure S20.** Spectrum of evolution of the reaction mixture ( $3,5\text{-Cl}_2\text{PhNCO} + 3\text{HBpin}$ ) over time (Cat **1**,  $\text{C}_6\text{D}_6$ , 300 MHz).

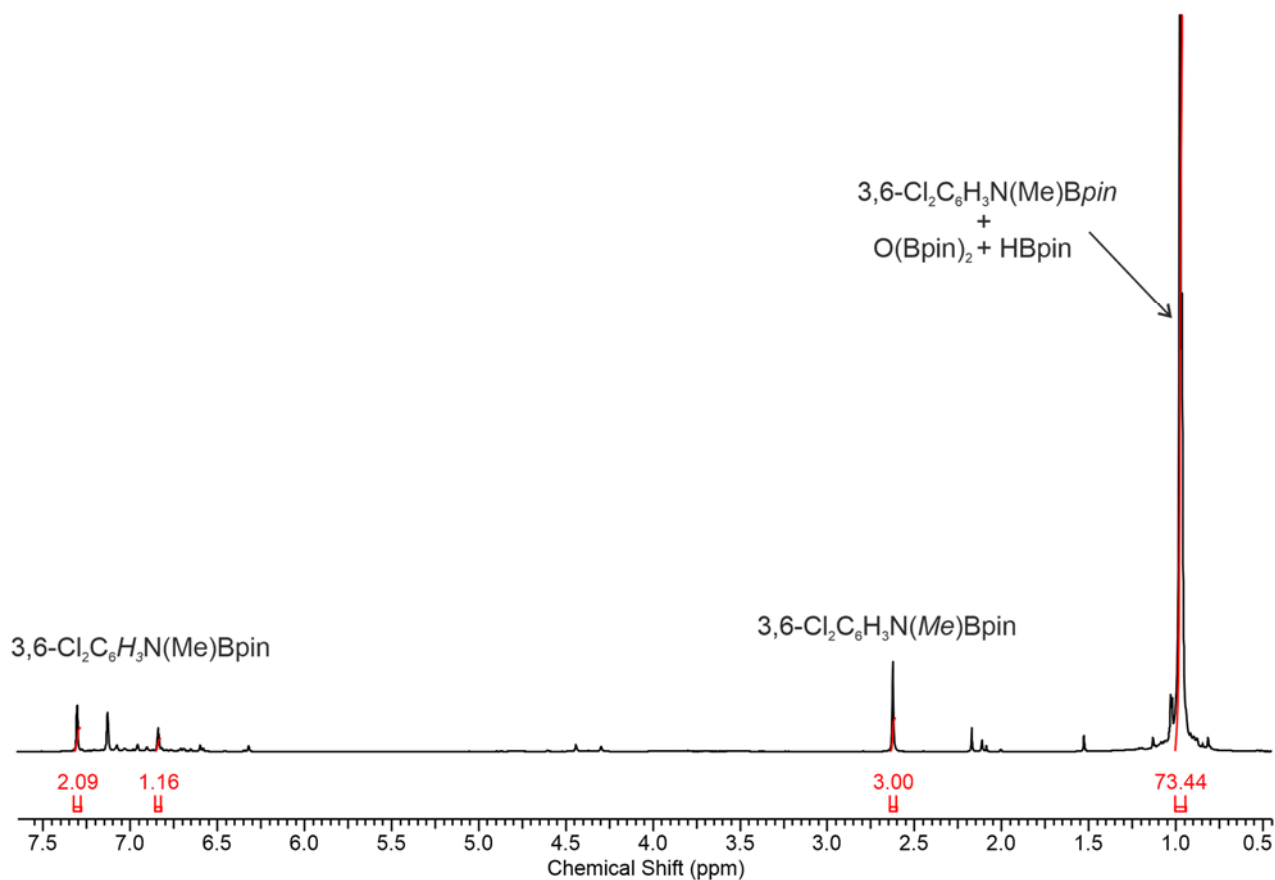

**Figure S21.**  $^1\text{H}$  NMR spectrum of compound  $3,6\text{-Cl}_2\text{PhN}(\text{Me})\text{Bpin}$  (Cat **1**,  $\text{C}_6\text{D}_6$ , 400 MHz,  $21^\circ\text{C}$ ).



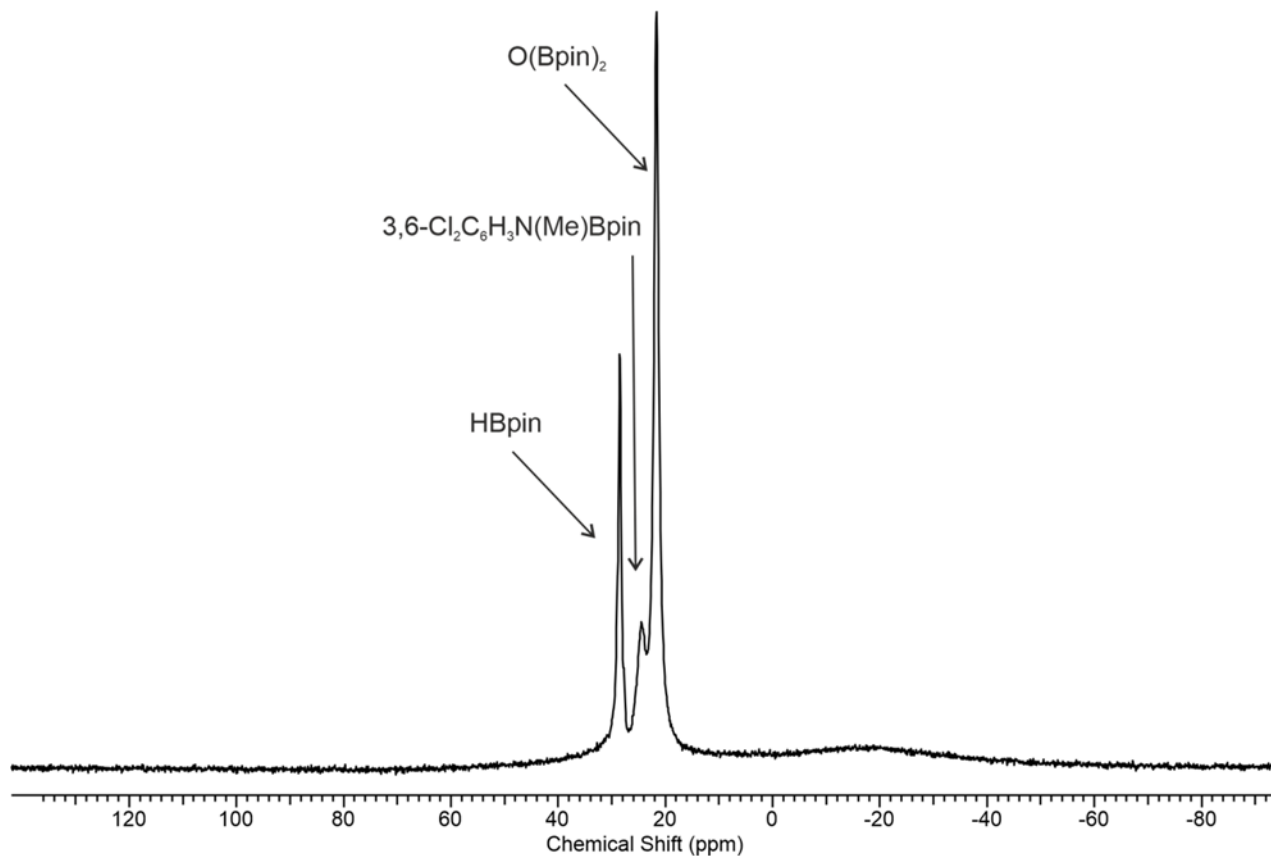

**Figure S22.**  $^{11}B$  NMR spectrum of compound  $3,6-Cl_2PhN(Me)Bpin$  (Cat **1**, 128 MHz,  $C_6D_6$ , 21 °C)

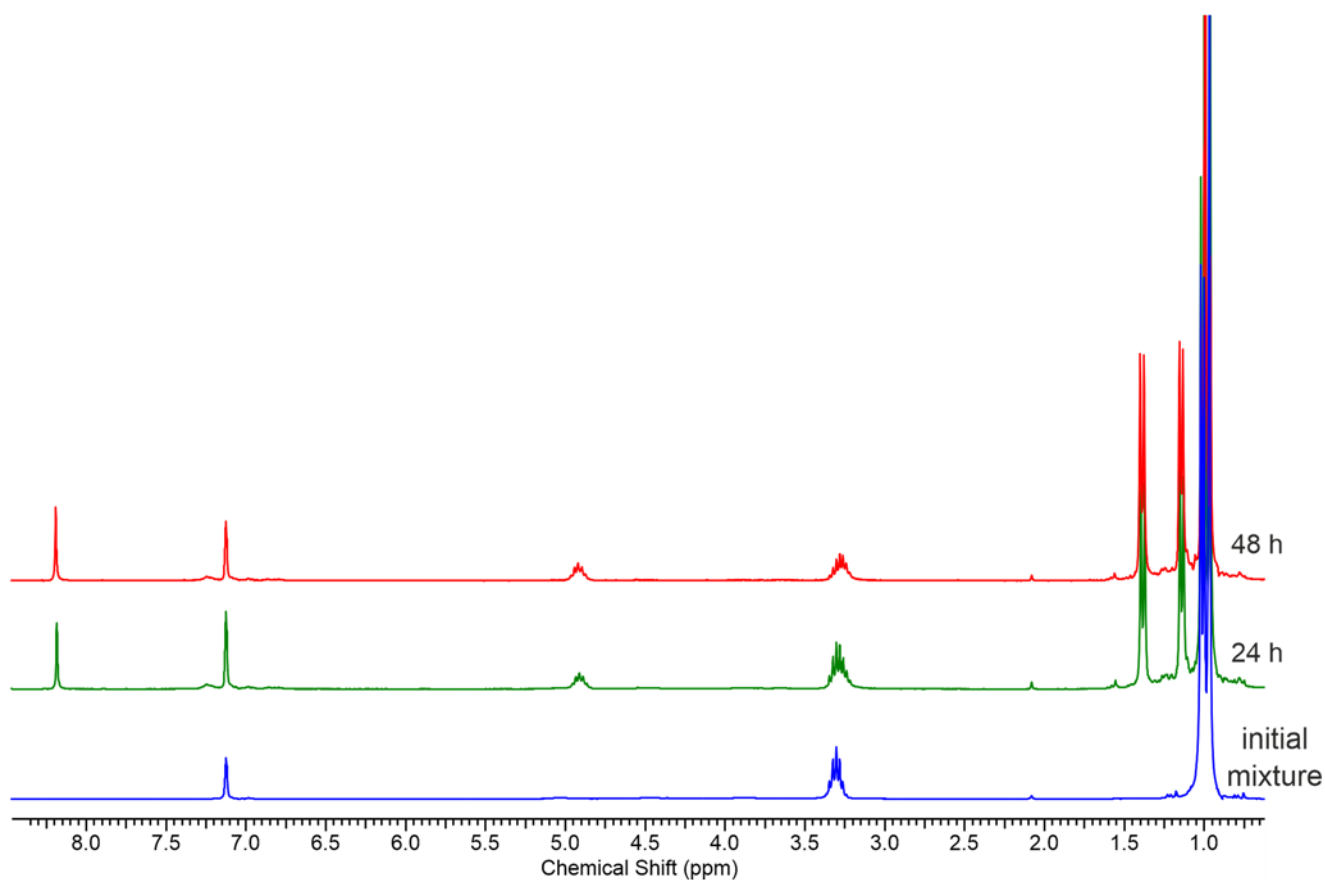

**Figure S23.** Spectrum of evolution of the reaction mixture ( $iPrNCN/Pr + HBpin$ ) over time (Cat **1**,  $C_6D_6$ , 300 MHz).

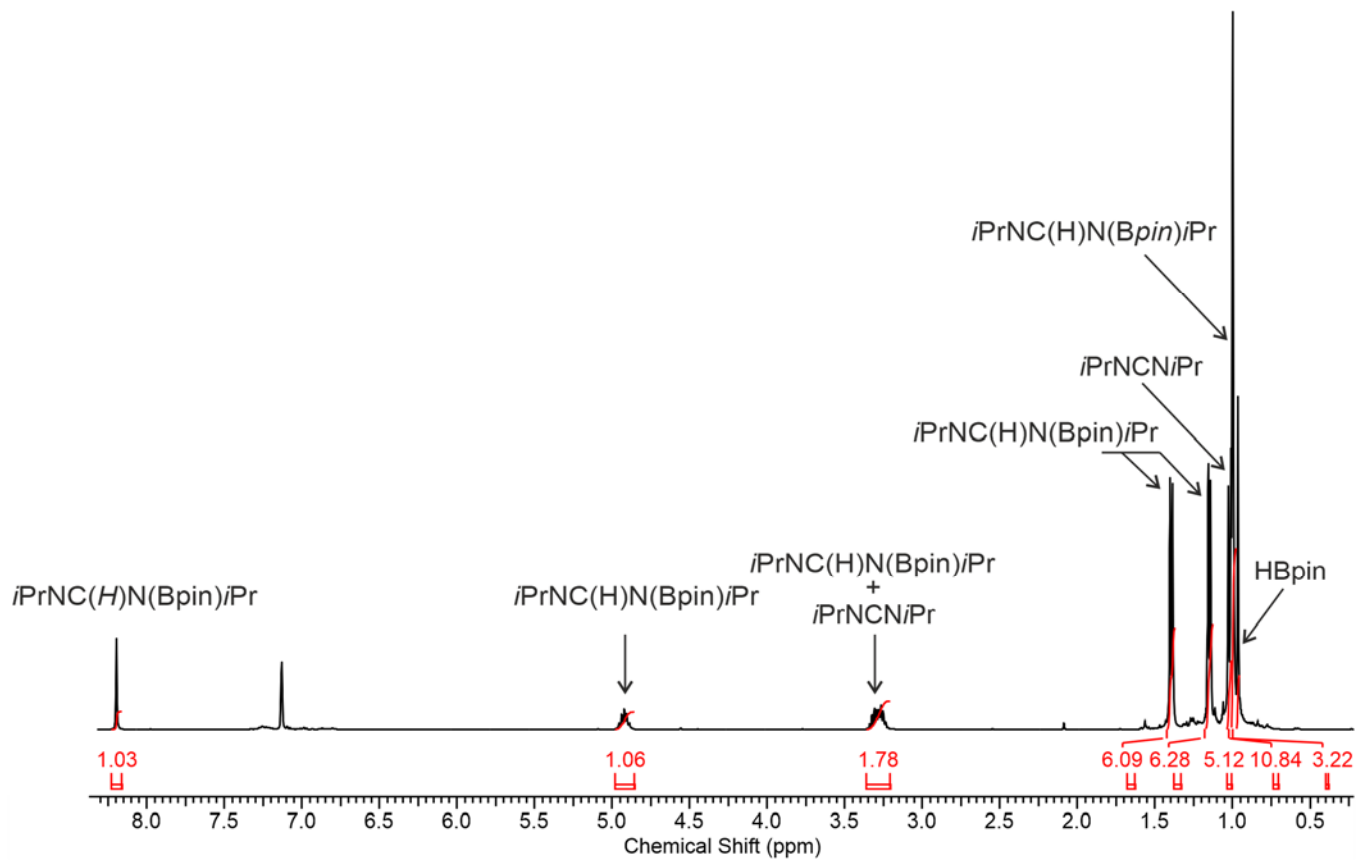

**Figure S24.**  $^1\text{H}$  NMR spectrum of compound  $i\text{PrNC(H)N(Bpin)iPr}$  (Cat 1,  $\text{C}_6\text{D}_6$ , 400 MHz, 21 °C).

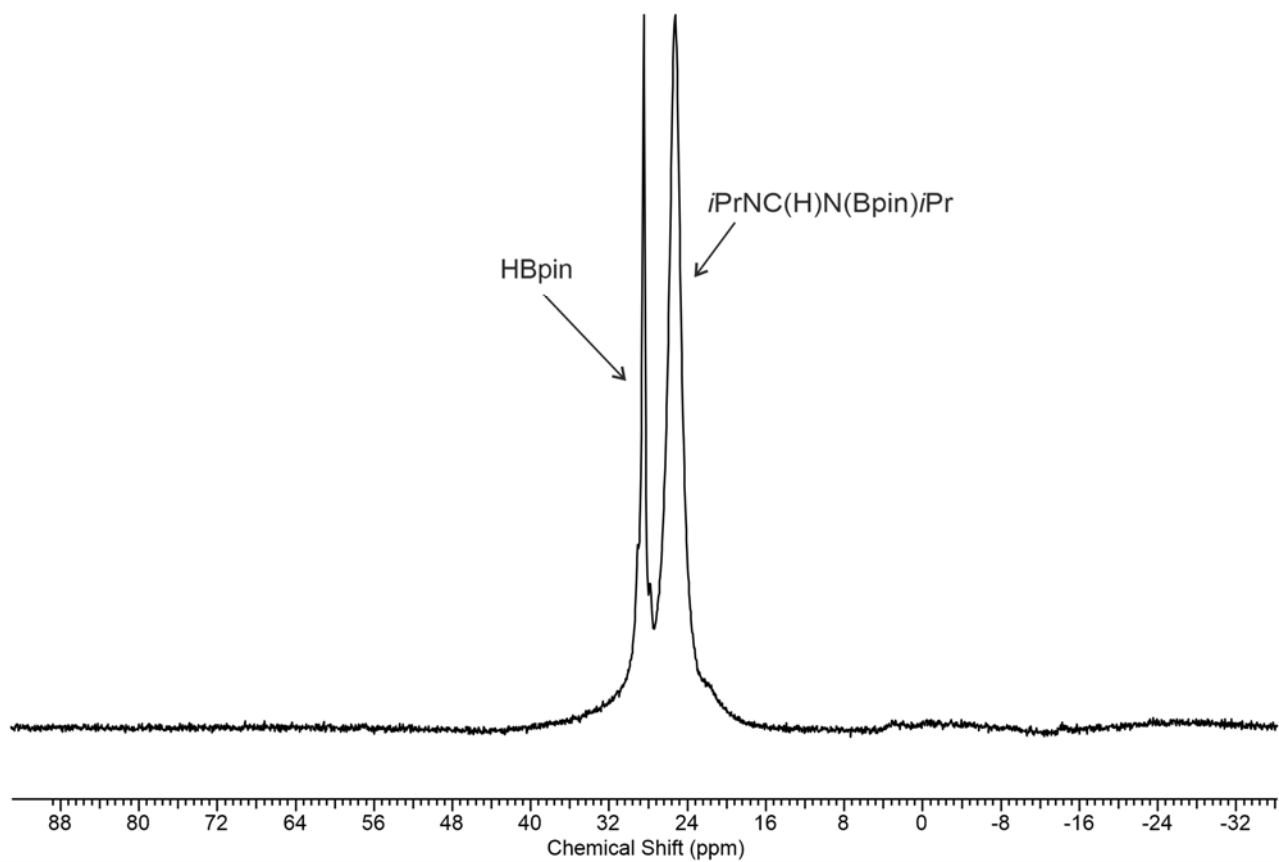

**Figure S25.**  $^{11}\text{B}$  NMR spectrum of compound  $i\text{PrNC(H)N(Bpin)iPr}$  (Cat 1, 128 MHz,  $\text{C}_6\text{D}_6$ , 21 °C).

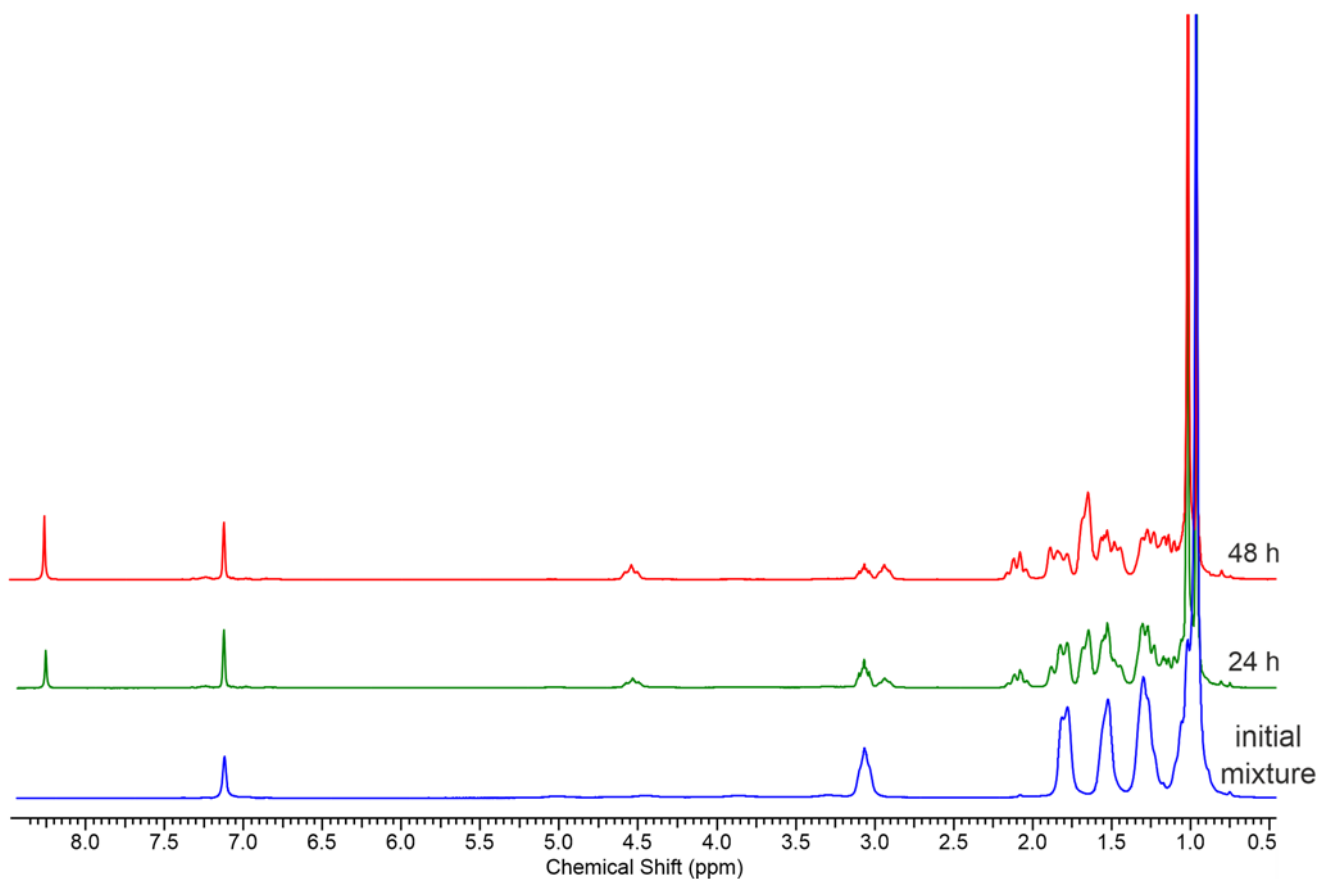

**Figure S26.** Spectrum of evolution of the reaction mixture (CyNCNCy + HBpin) over time (Cat **1**, C<sub>6</sub>D<sub>6</sub>, 300 MHz).

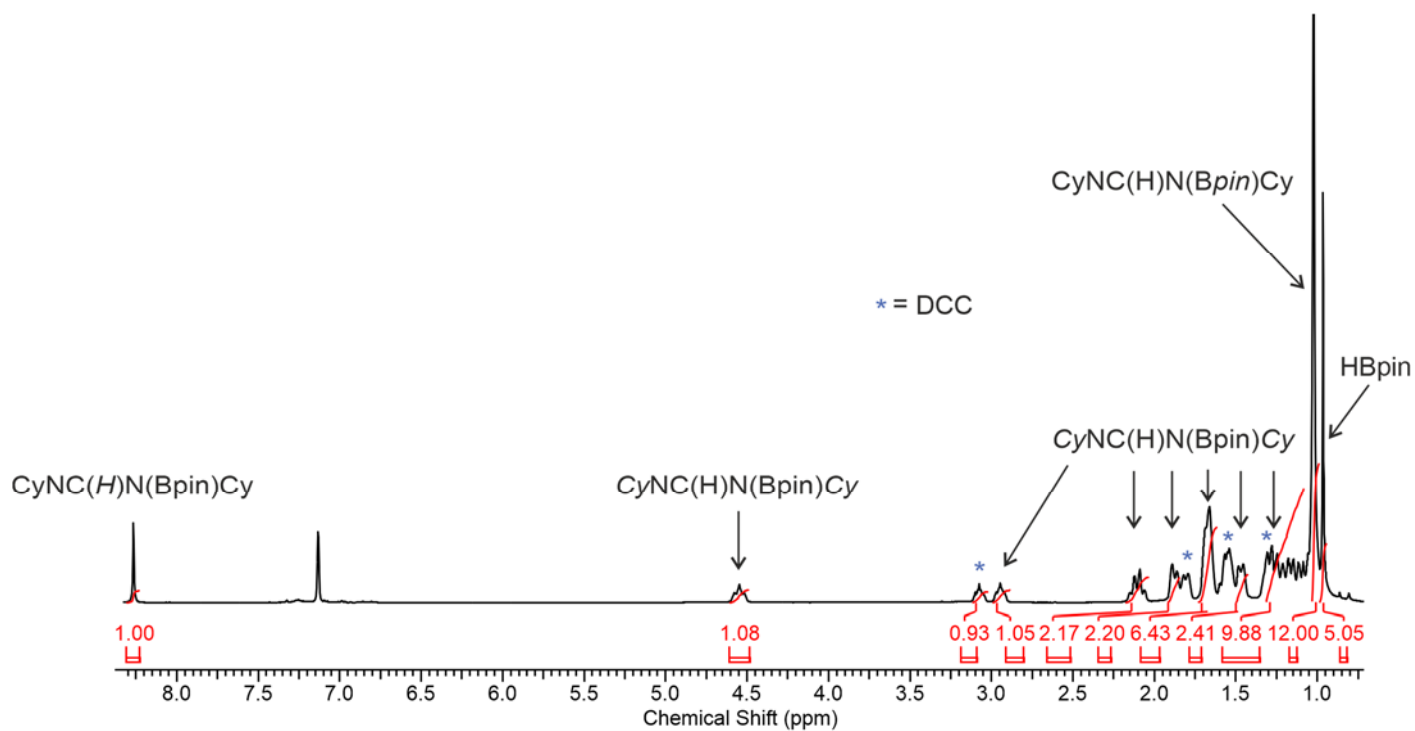

**Figure S27.** <sup>1</sup>H NMR spectrum of compound CyNC(H)N(Bpin)Cy (Cat **1**, C<sub>6</sub>D<sub>6</sub>, 400 MHz, 21 °C).

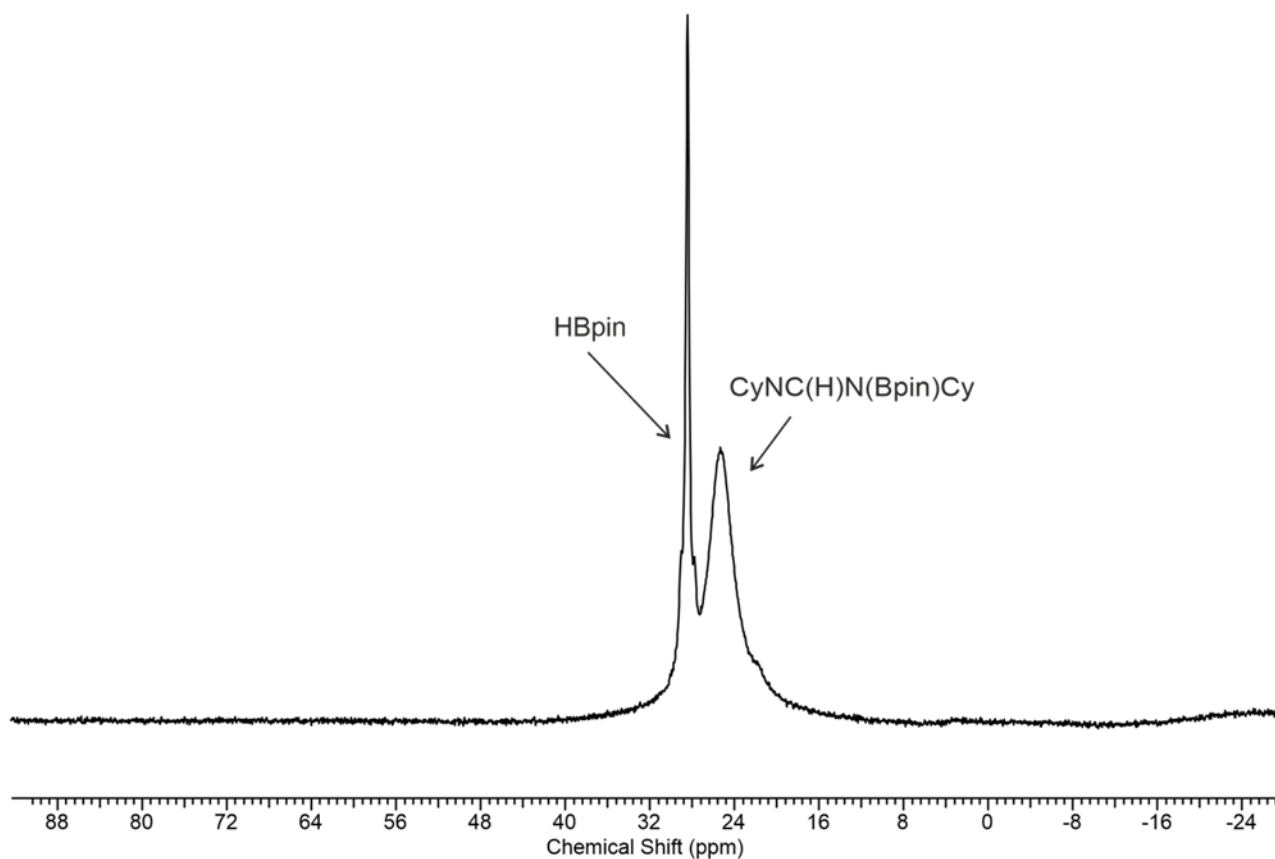

**Figure S28.**  $^{11}\text{B}$  NMR spectrum of compound  $\text{CyNC(H)N(Bpin)Cy}$  (Cat **1**, 128 MHz,  $\text{C}_6\text{D}_6$ , 21 °C)

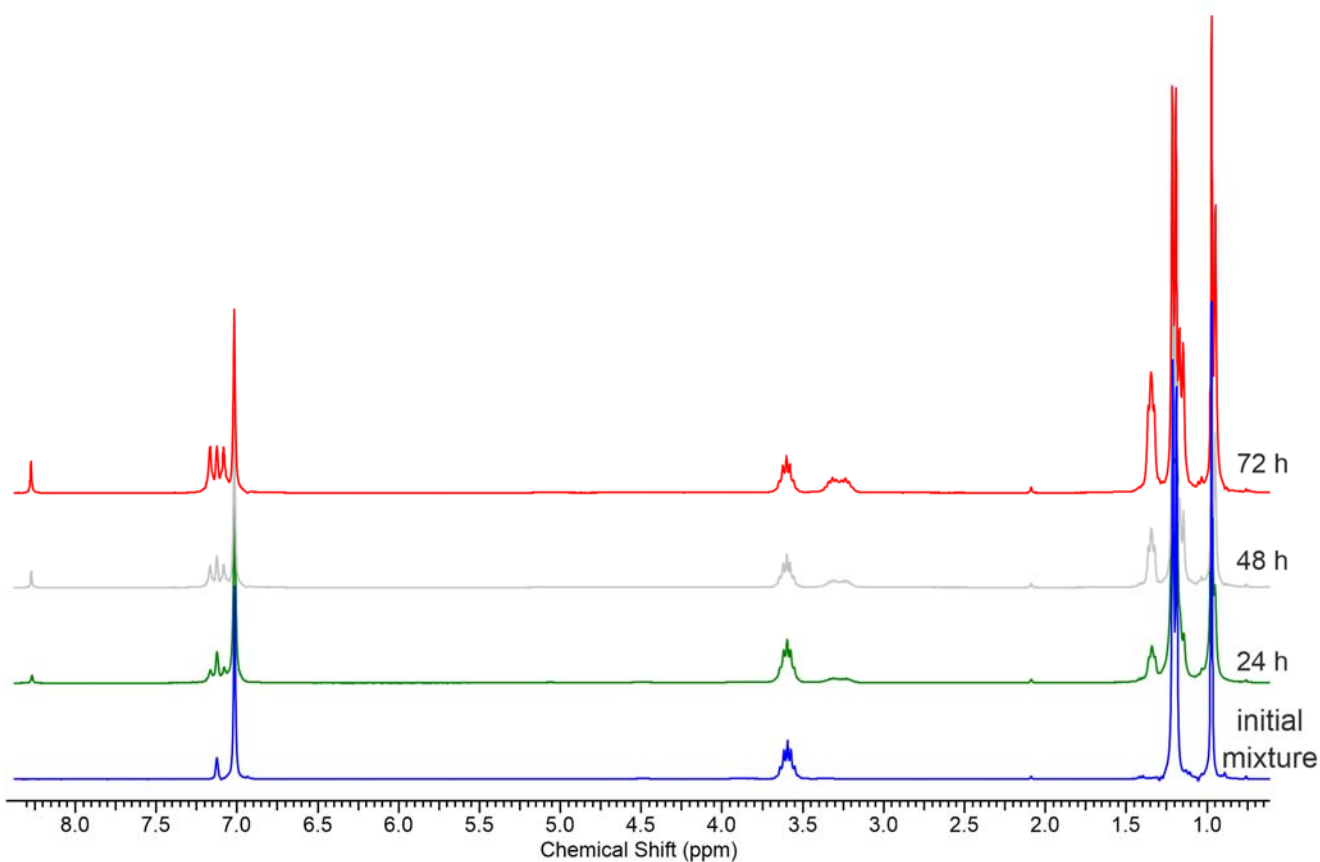

**Figure S29.** Spectrum of evolution of the reaction mixture ( $\text{DppNCNDpp} + \text{HBpin}$ ) over time (Cat **1**,  $\text{C}_6\text{D}_6$ , 300 MHz).

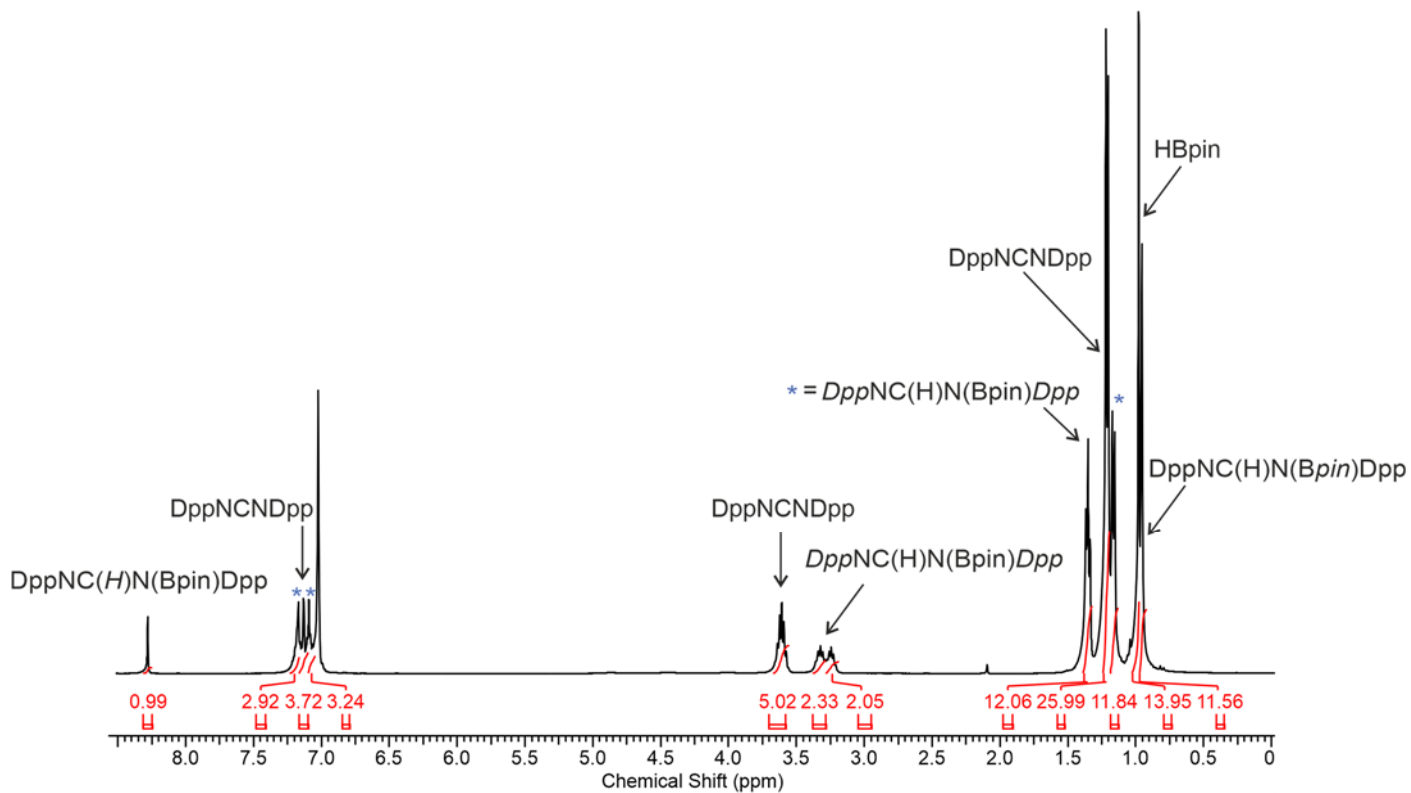

**Figure S30.**  $^1\text{H}$  NMR spectrum of compound  $\text{DppNC(H)N(Bpin)Dpp}$  (Cat **1**,  $\text{C}_6\text{D}_6$ , 400 MHz, 21  $^\circ\text{C}$ ).

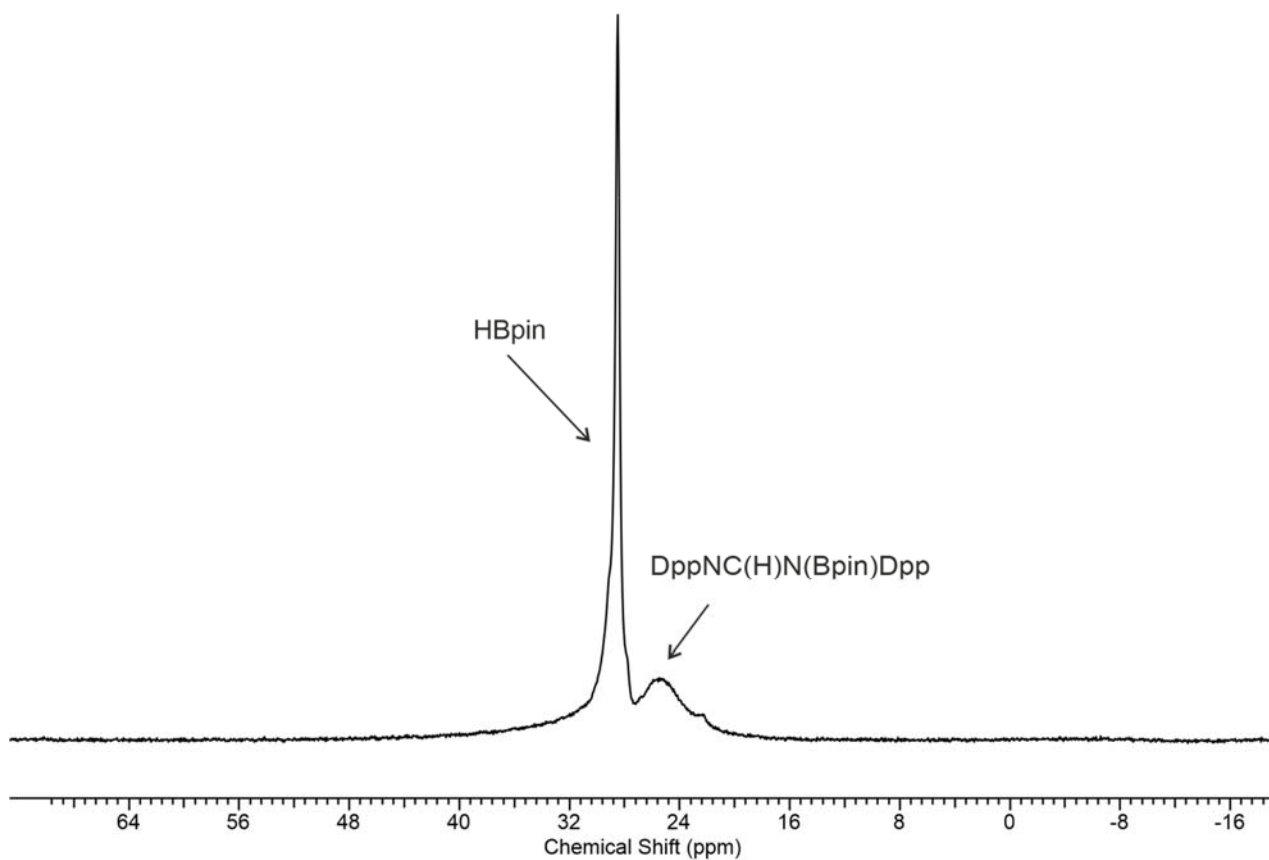

**Figure S31.**  $^{11}\text{B}$  NMR spectrum of compound  $\text{DppNC(H)N(Bpin)Dpp}$  (Cat **1**, 128 MHz,  $\text{C}_6\text{D}_6$ , 21  $^\circ\text{C}$ )

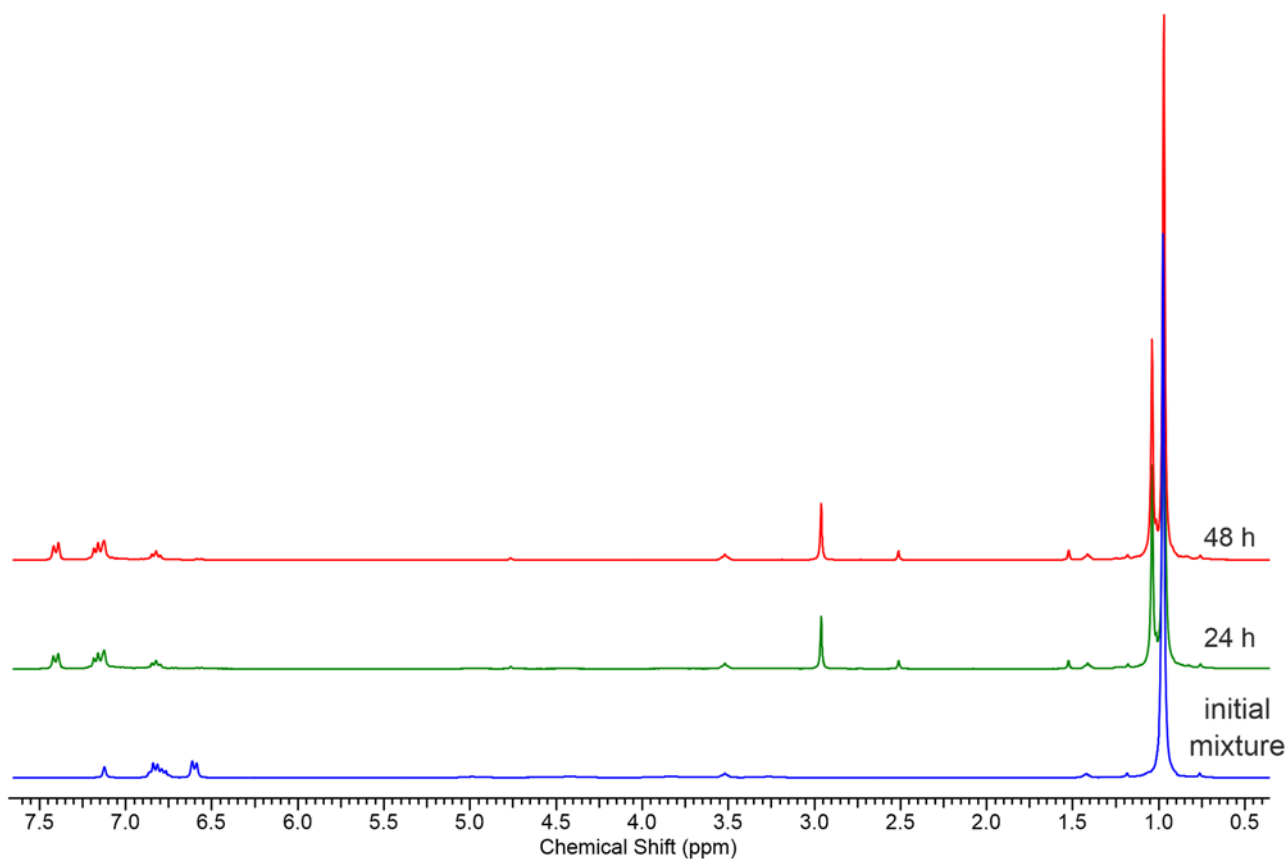

**Figure S32.** Spectrum of evolution of the reaction mixture (PhNCO + 3HBpin) over time (Cat 5,  $\text{C}_6\text{D}_6$ , 300 MHz).

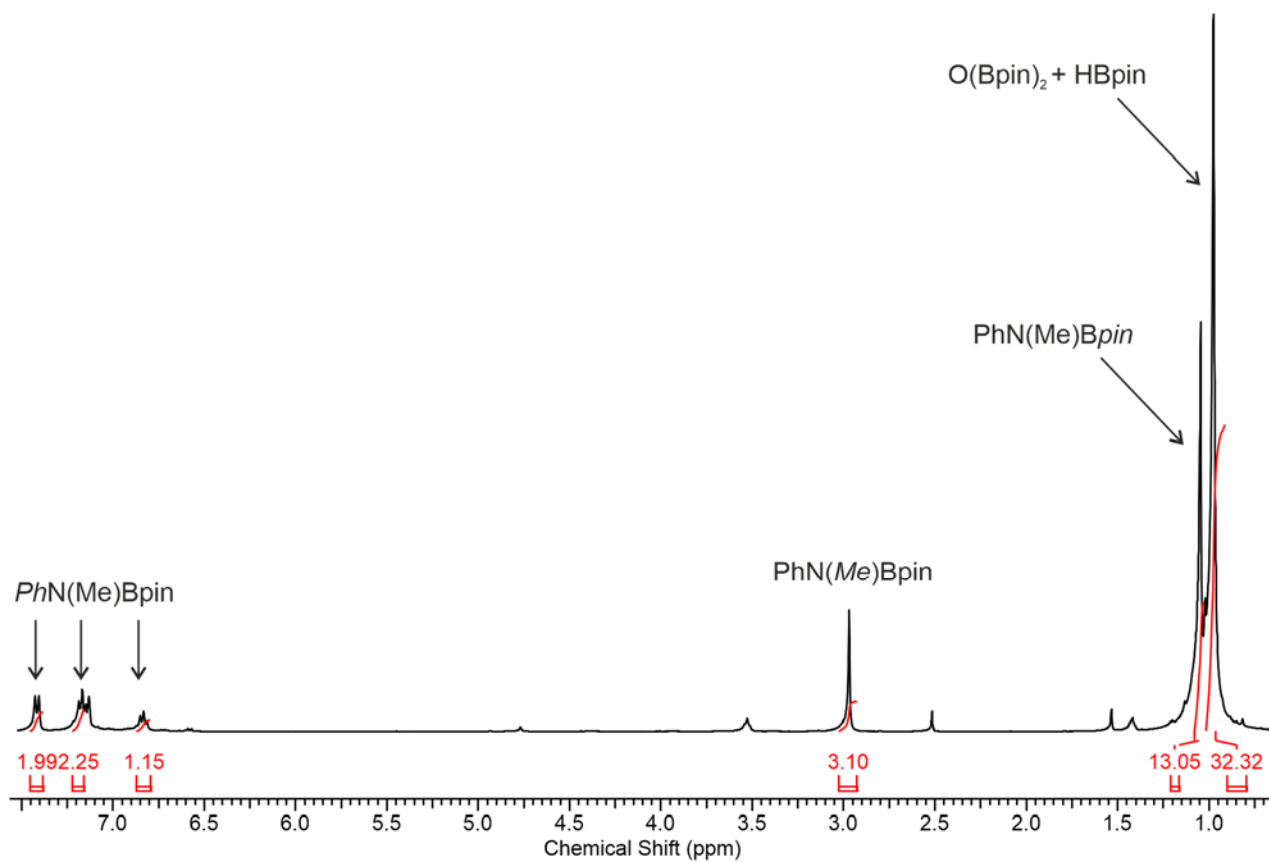

**Figure S33.**  $^1\text{H}$  NMR spectrum of compound PhN(Me)Bpin (Cat 5,  $\text{C}_6\text{D}_6$ , 400 MHz, 21 °C).

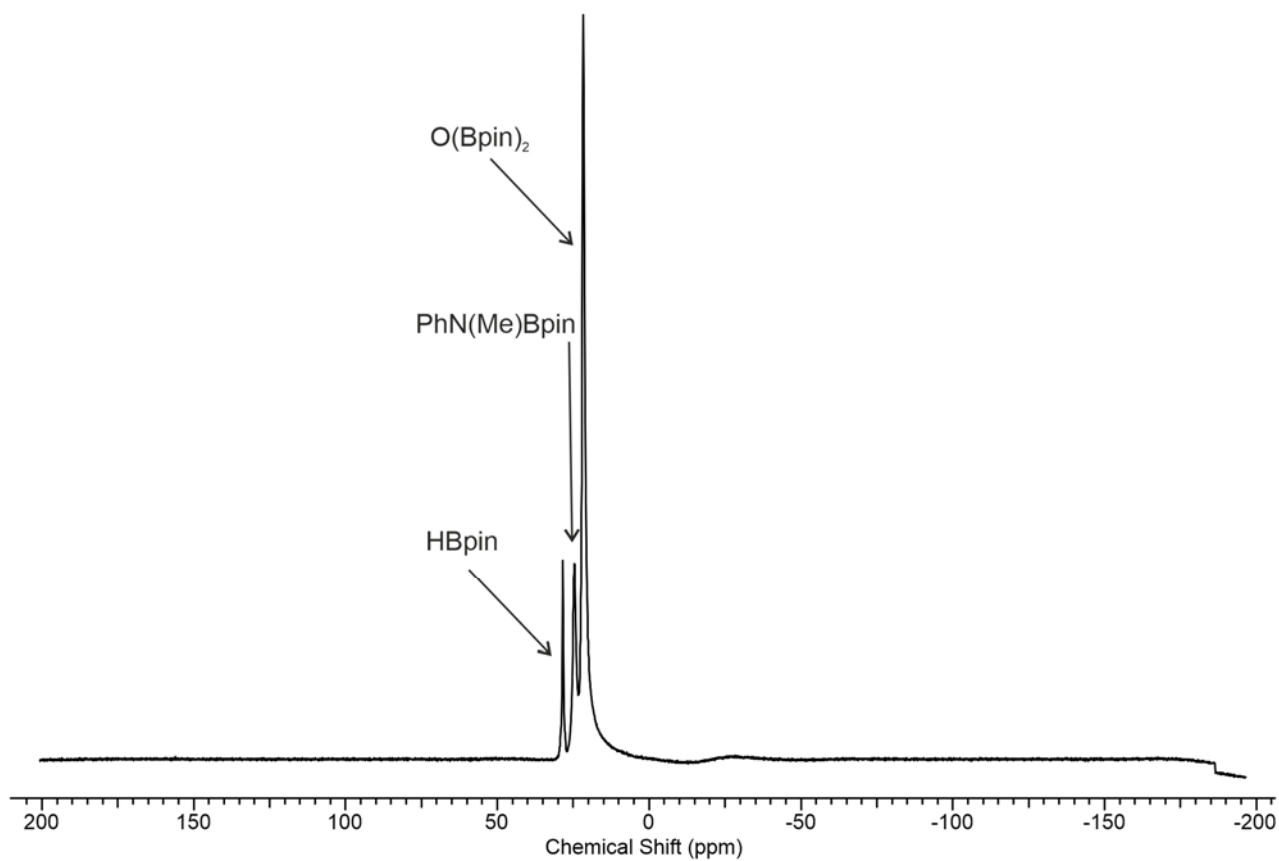

**Figure S34.**  $^{11}\text{B}$  NMR spectrum of compound PhN(Me)Bpin (Cat **5**, 128 MHz,  $\text{C}_6\text{D}_6$ , 21 °C)
